# Supplementary material for: Role of the HCF-1 Basic Region in Sustaining Cell Proliferation
Source: PubMed Central journal article supplement (PMC2814863; doi:10.1371/journal.pone.0009020), 2010-02-02

Supplemental Figure 1:  
tsBN67 colony assay with the 11  
scanning deletion mutants

# HCF-1<sub>N1011</sub>

1st transfection

2nd transfection

3rd transfection

Permissive

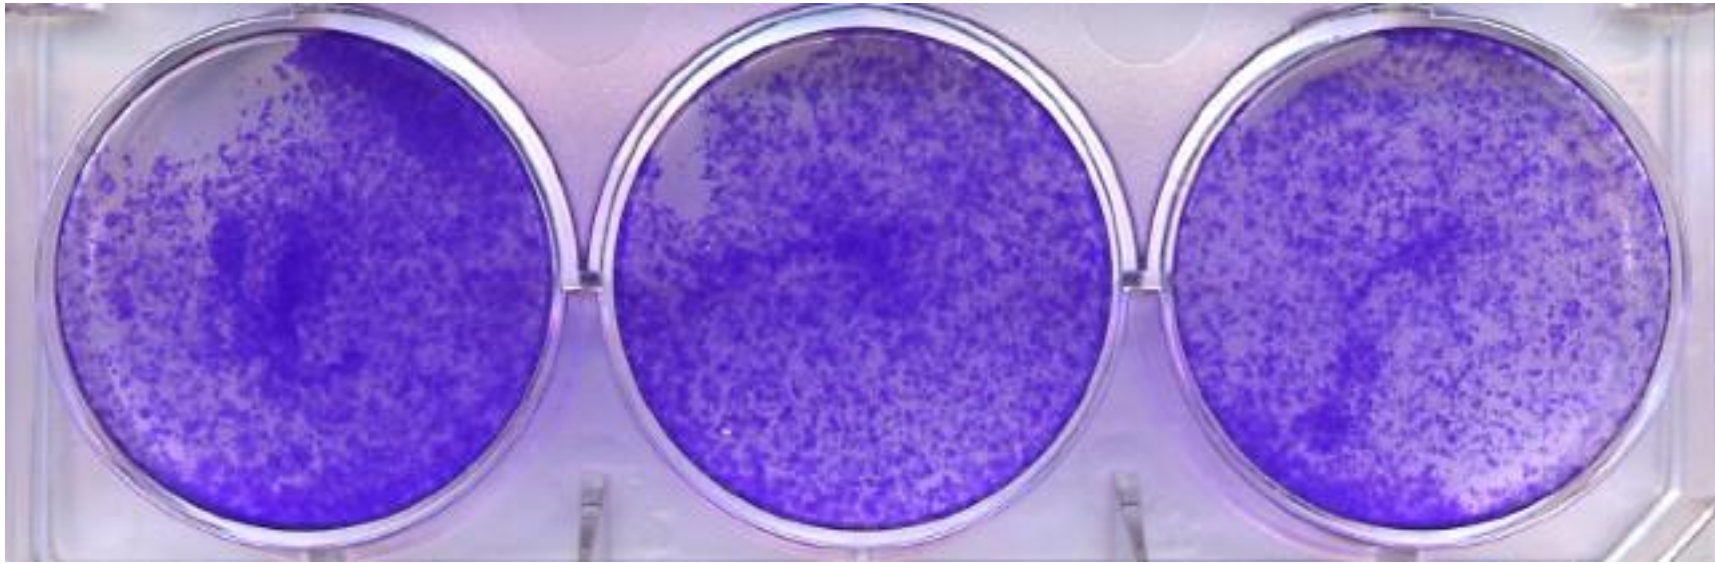

Non Permissive

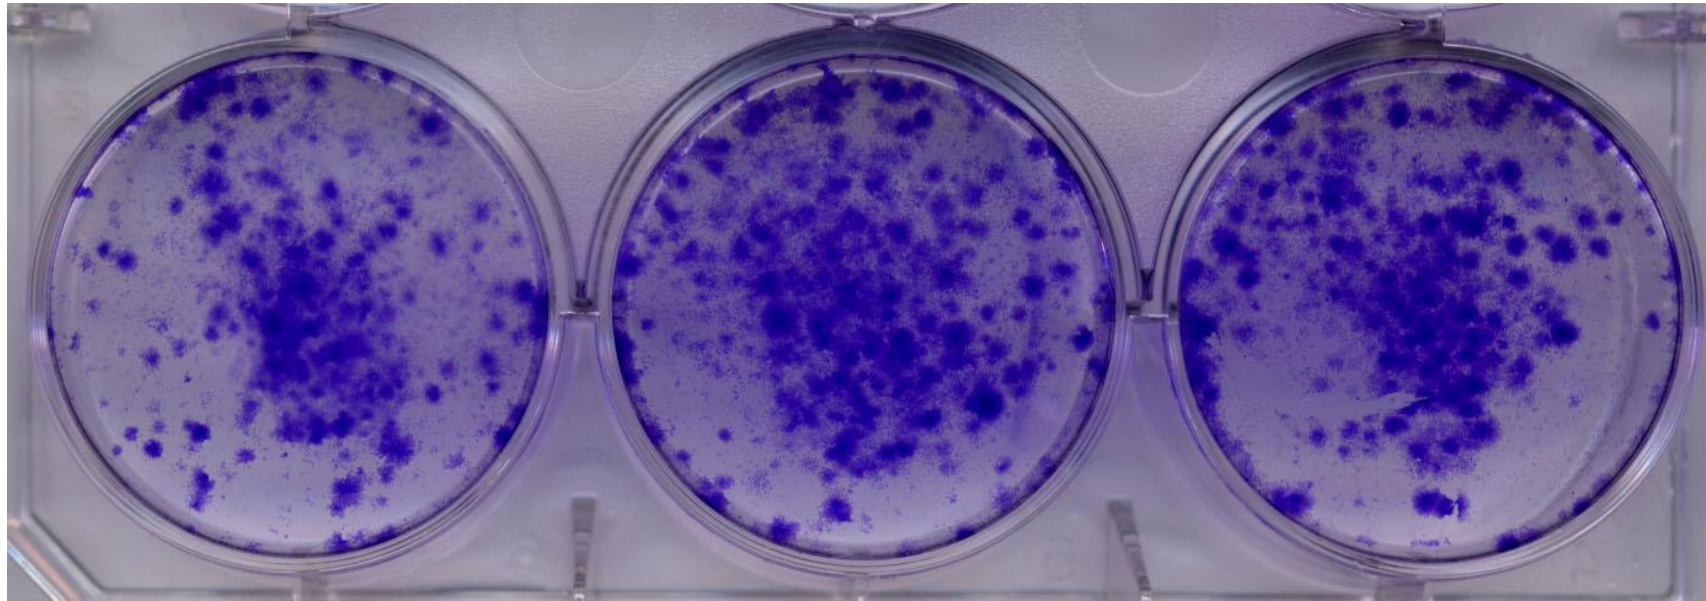

# HCF-1<sub>N1011Δ450-500</sub>

1st transfection

2nd transfection

3rd transfection

Permissive

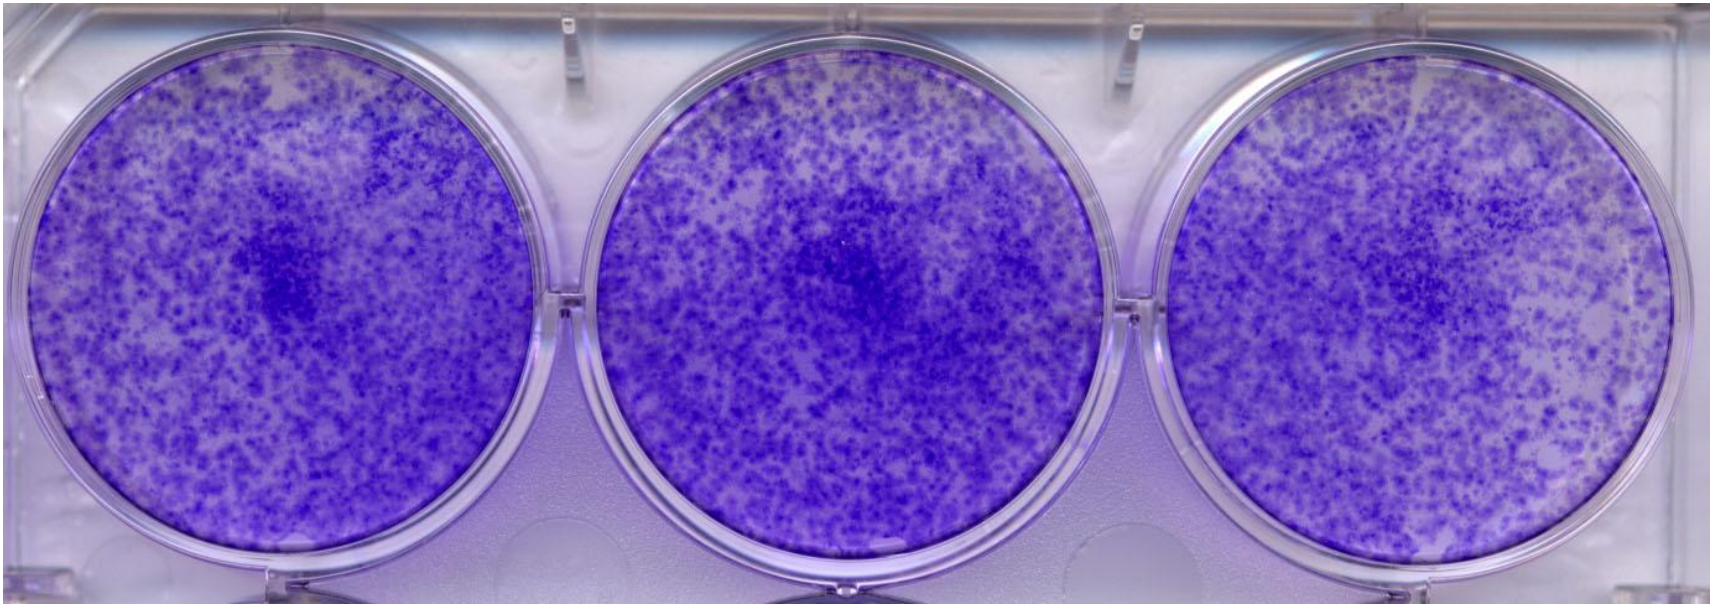

Non Permissive

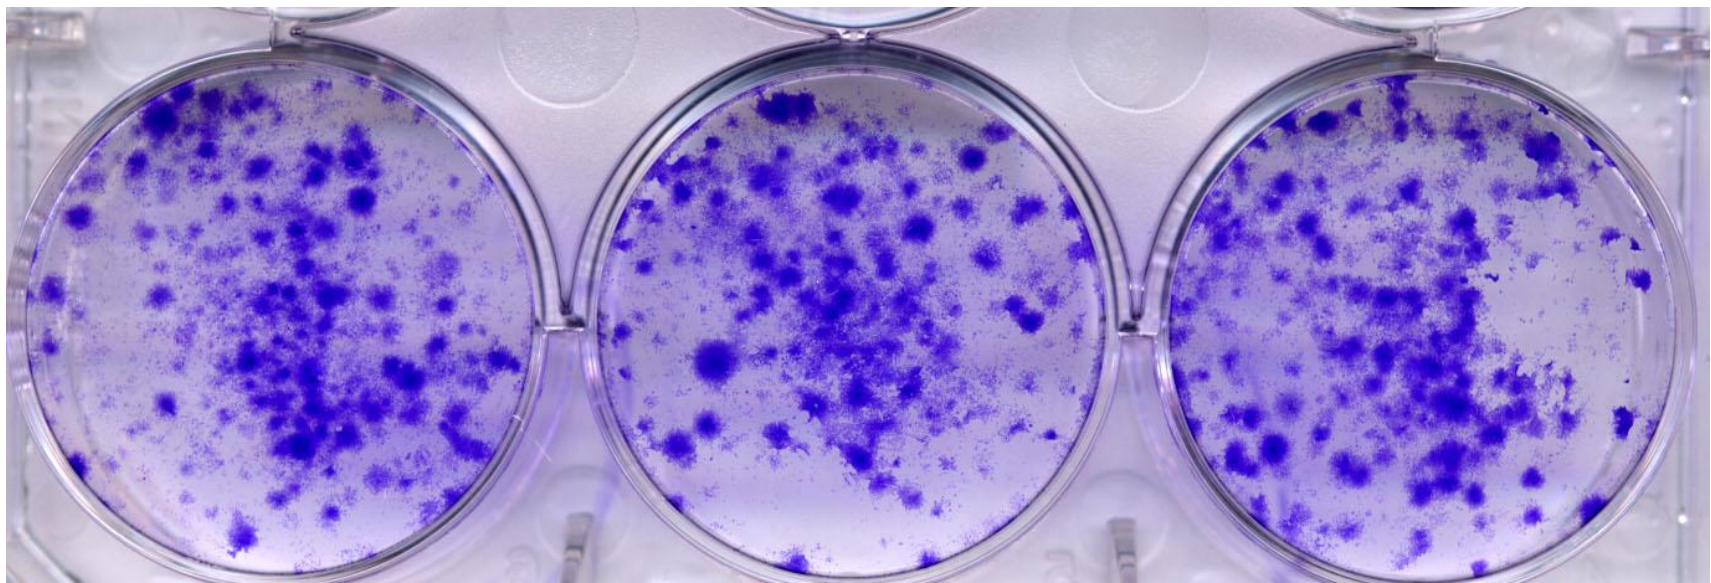

# HCF-1<sub>N1011Δ500-550</sub>

1st transfection

2nd transfection

3rd transfection

Permissive

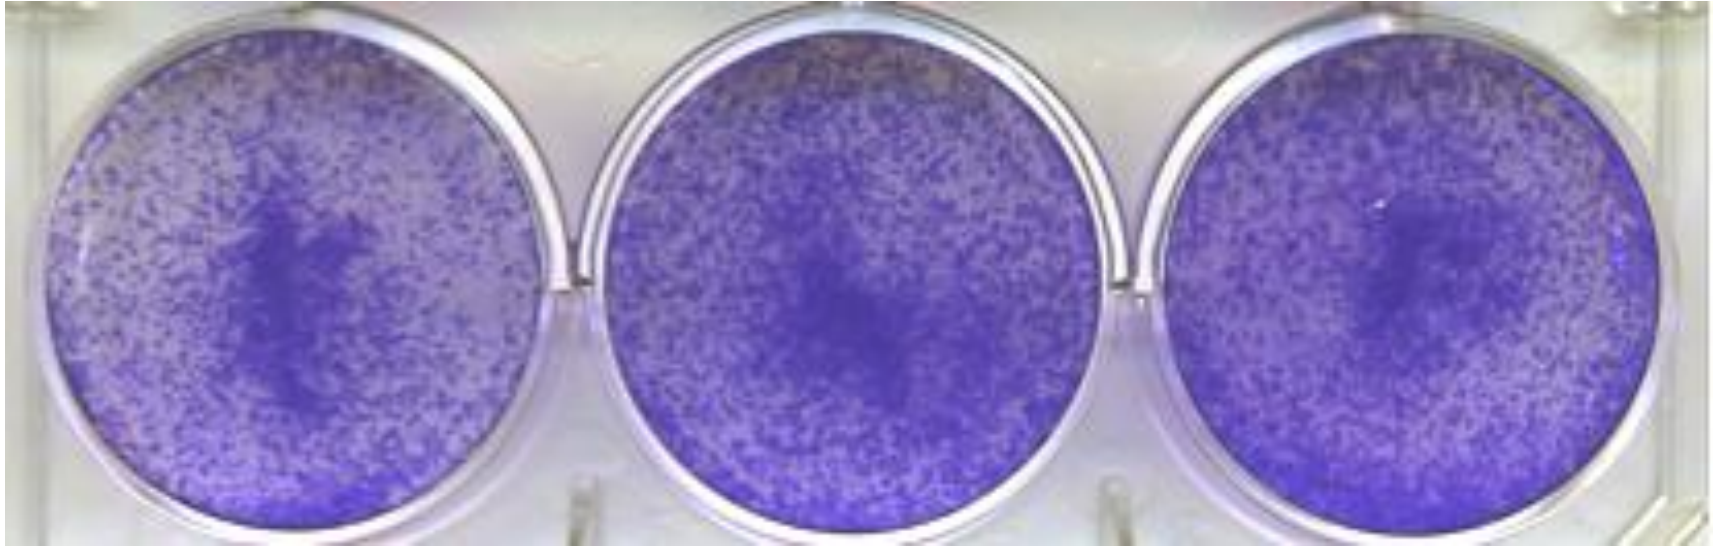

Non Permissive

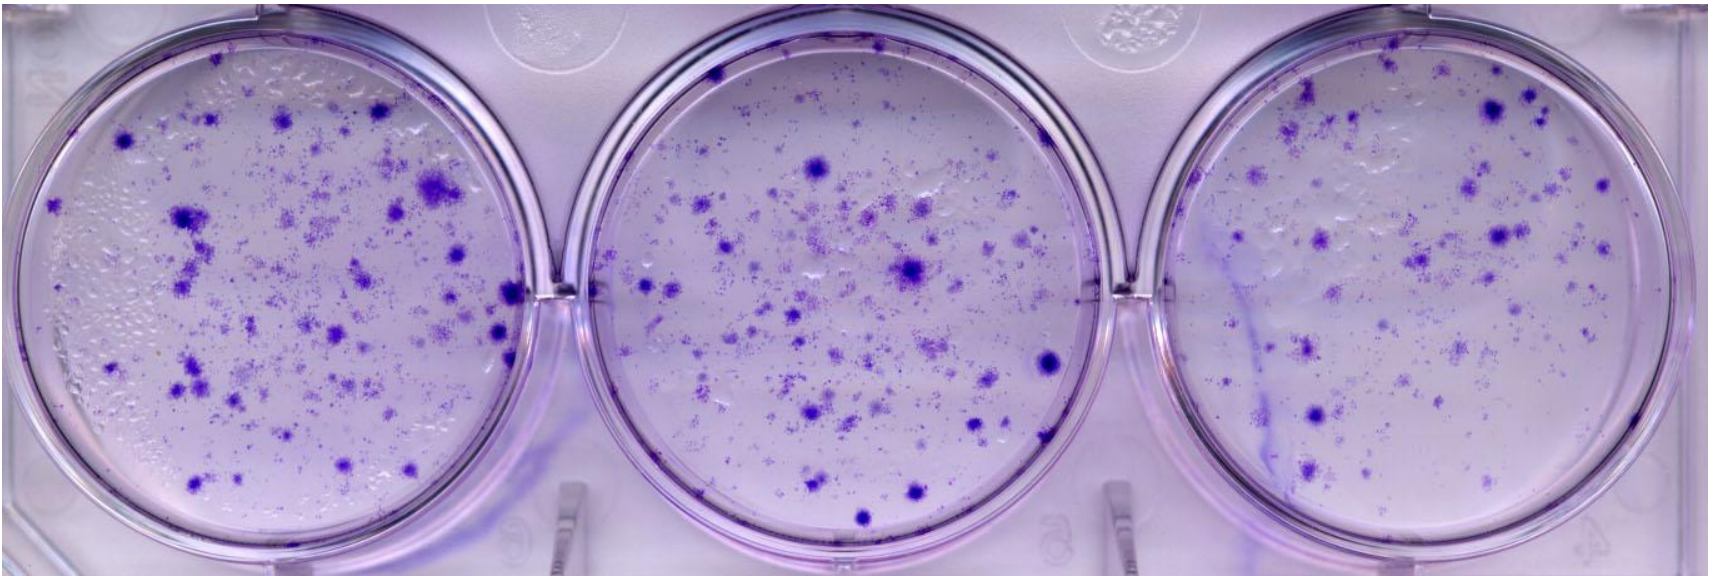

# HCF-1<sub>N1011Δ550-600</sub>

1st transfection

2nd transfection

3rd transfection

Permissive

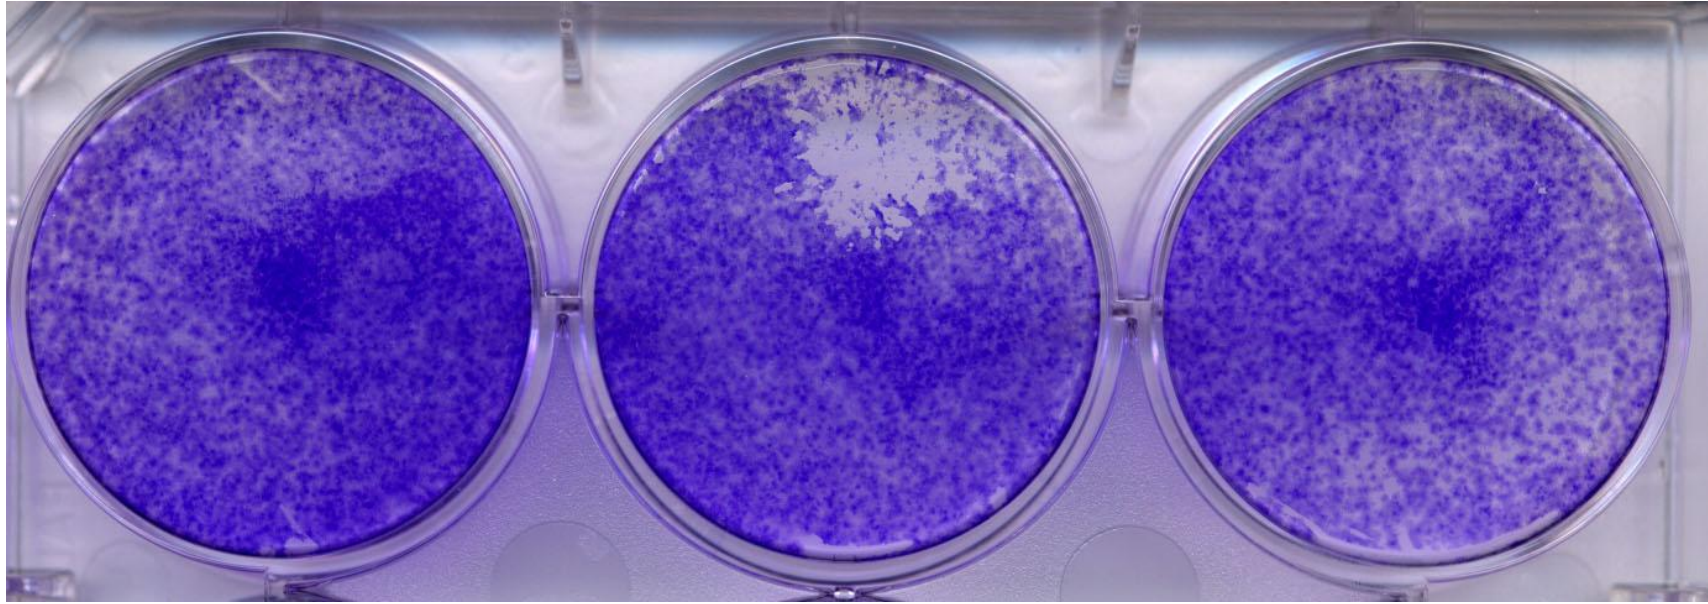

Non Permissive

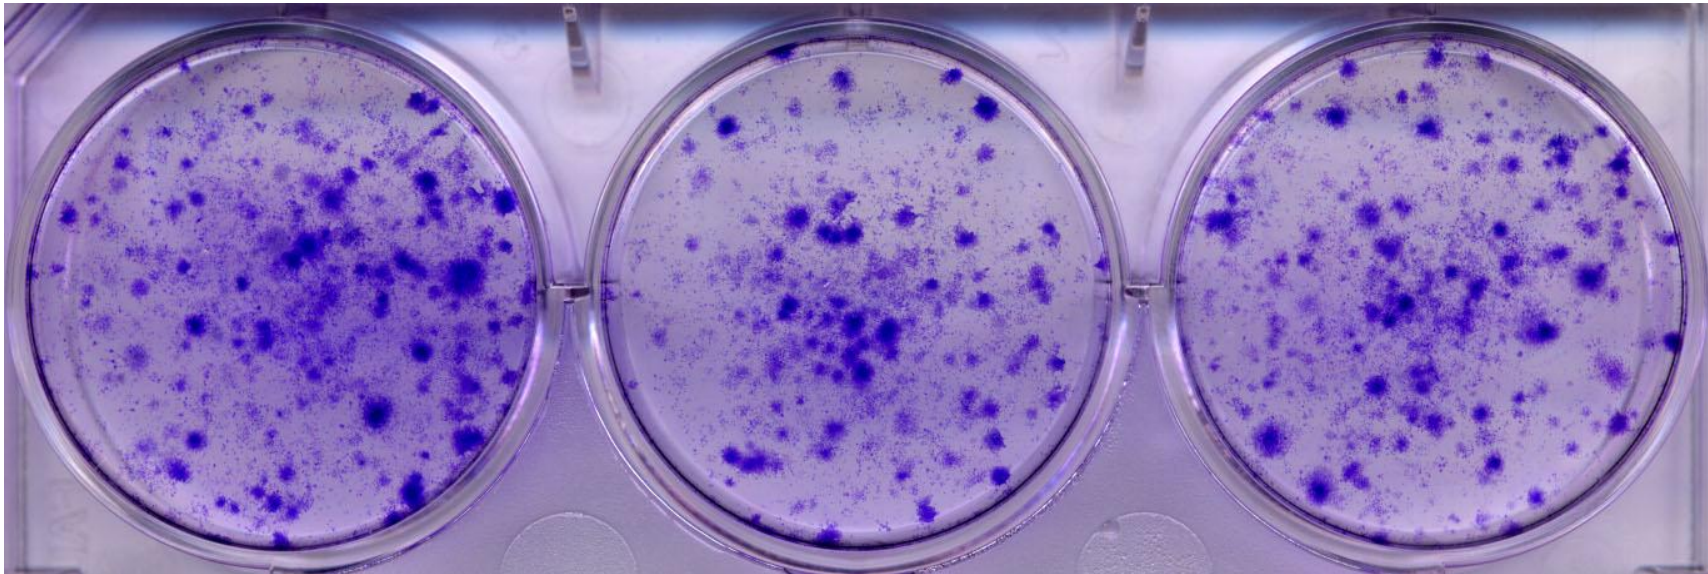

# HCF-1<sub>N1011Δ600-650</sub>

1st transfection

2nd transfection

3rd transfection

Permissive

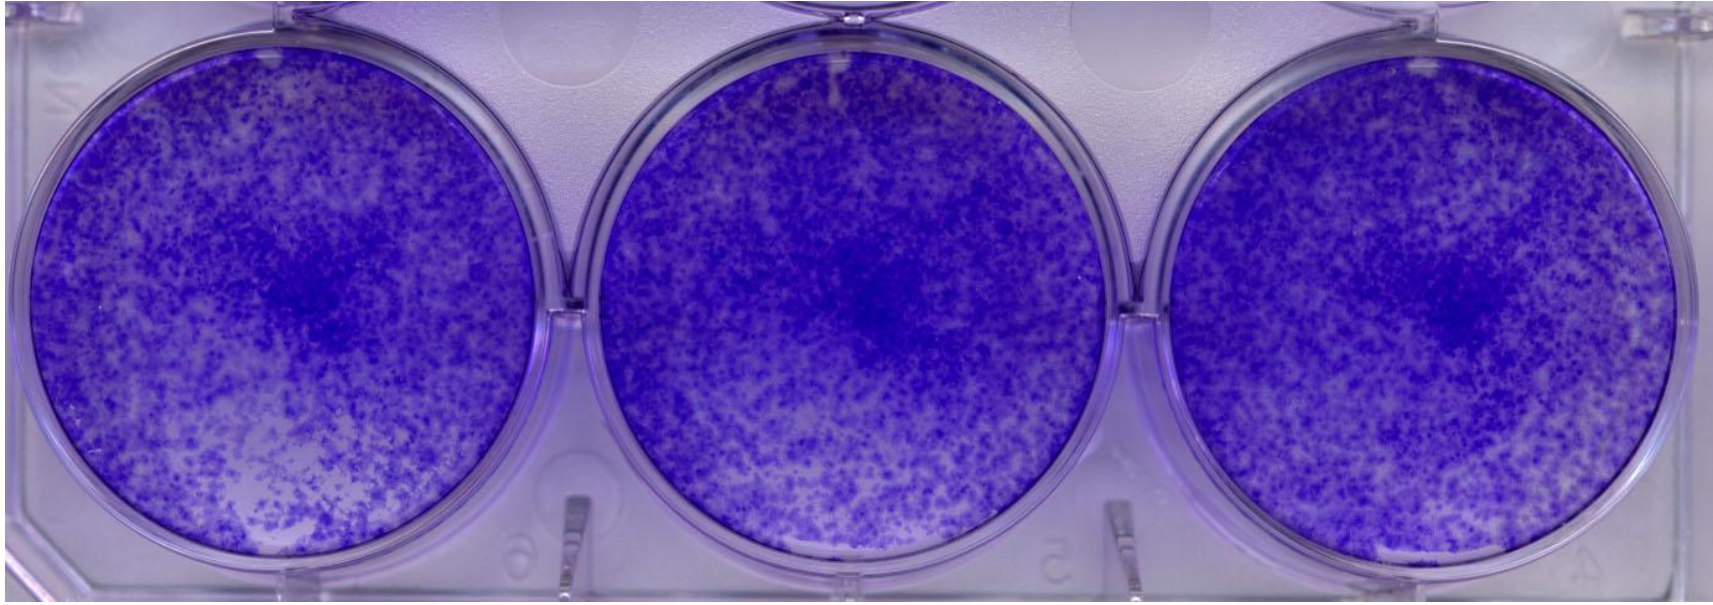

Non Permissive

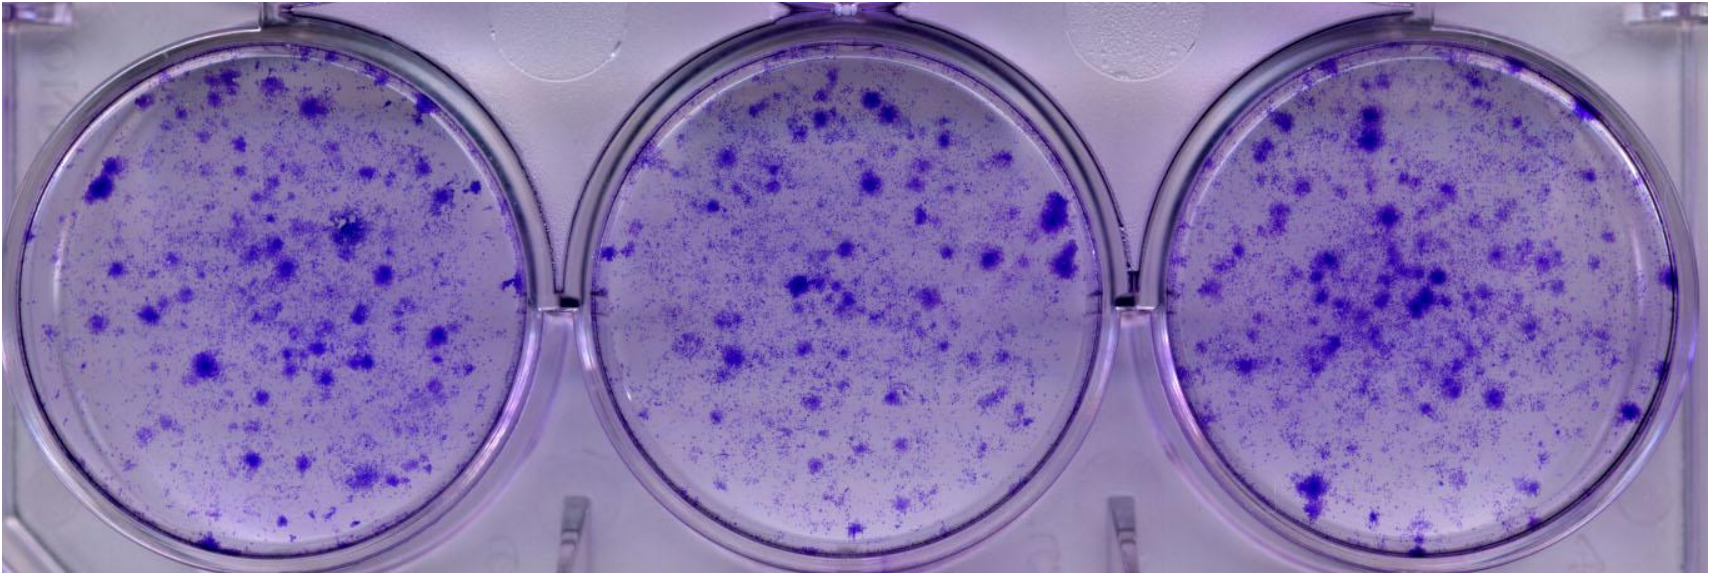

# HCF-1<sub>N1011Δ650-700</sub>

1st transfection

2nd transfection

3rd transfection

Permissive

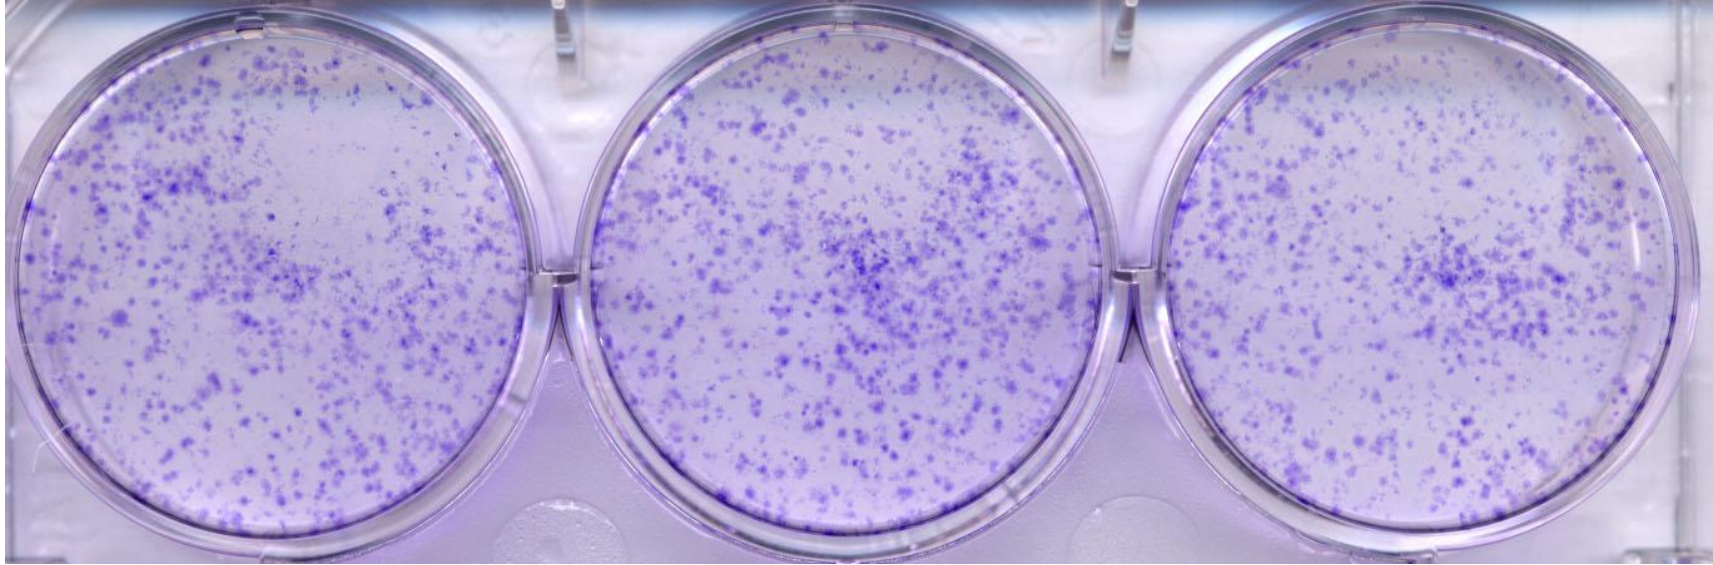

Non Permissive

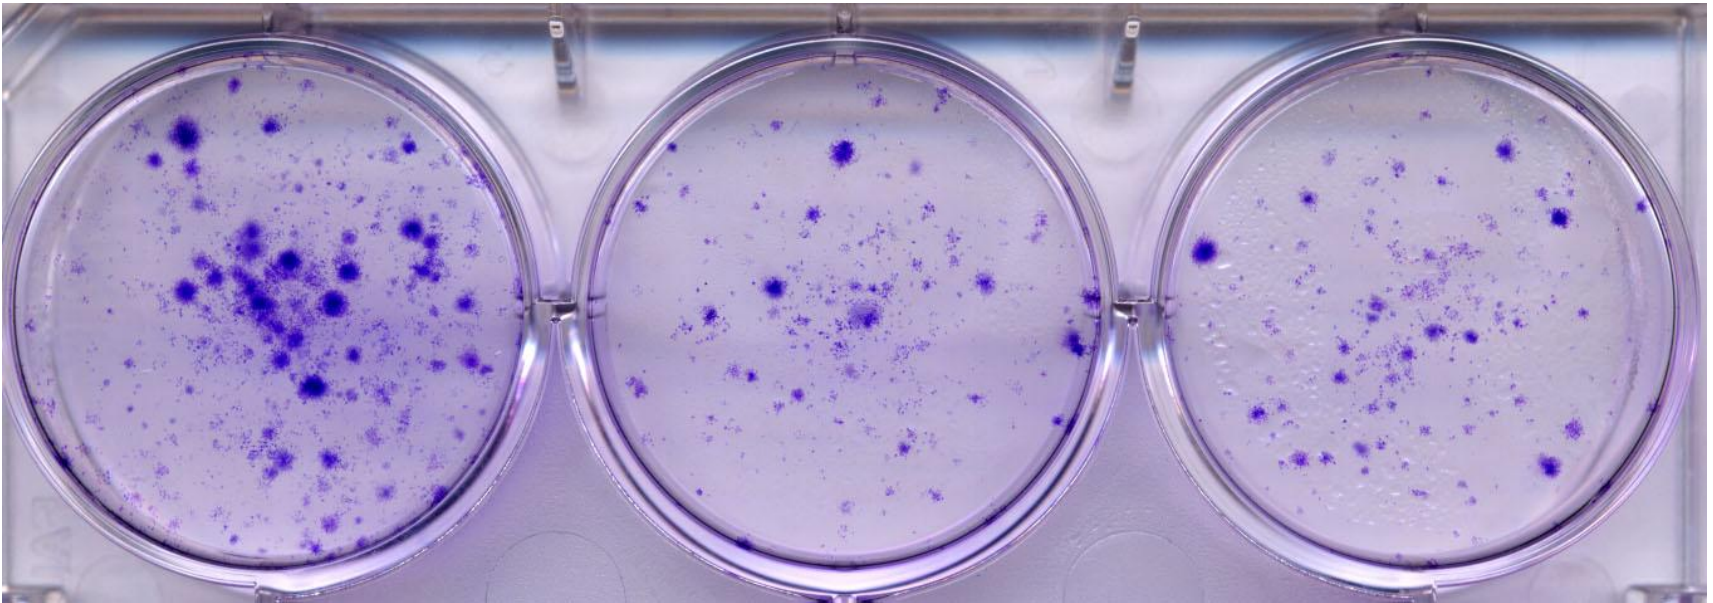

# HCF-1<sub>N1011Δ700-750</sub>

1st transfection

2nd transfection

3rd transfection

Permissive

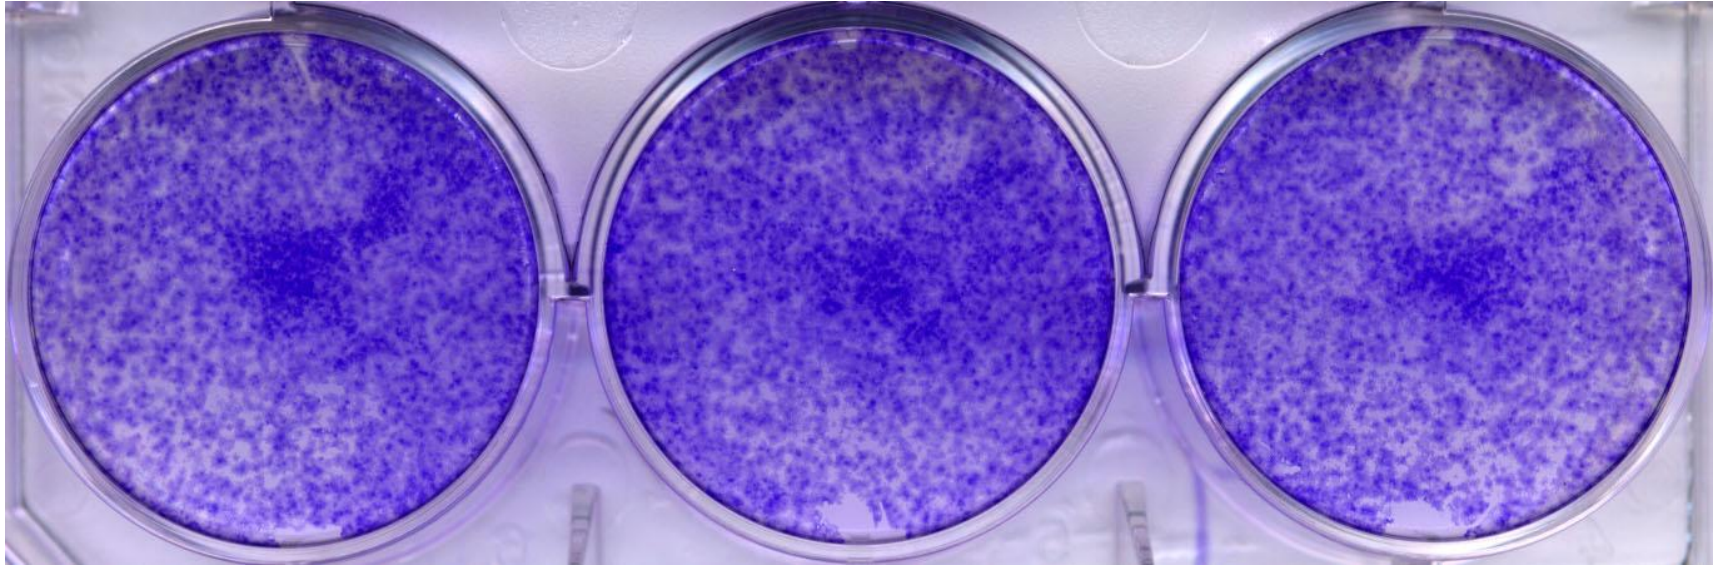

Non Permissive

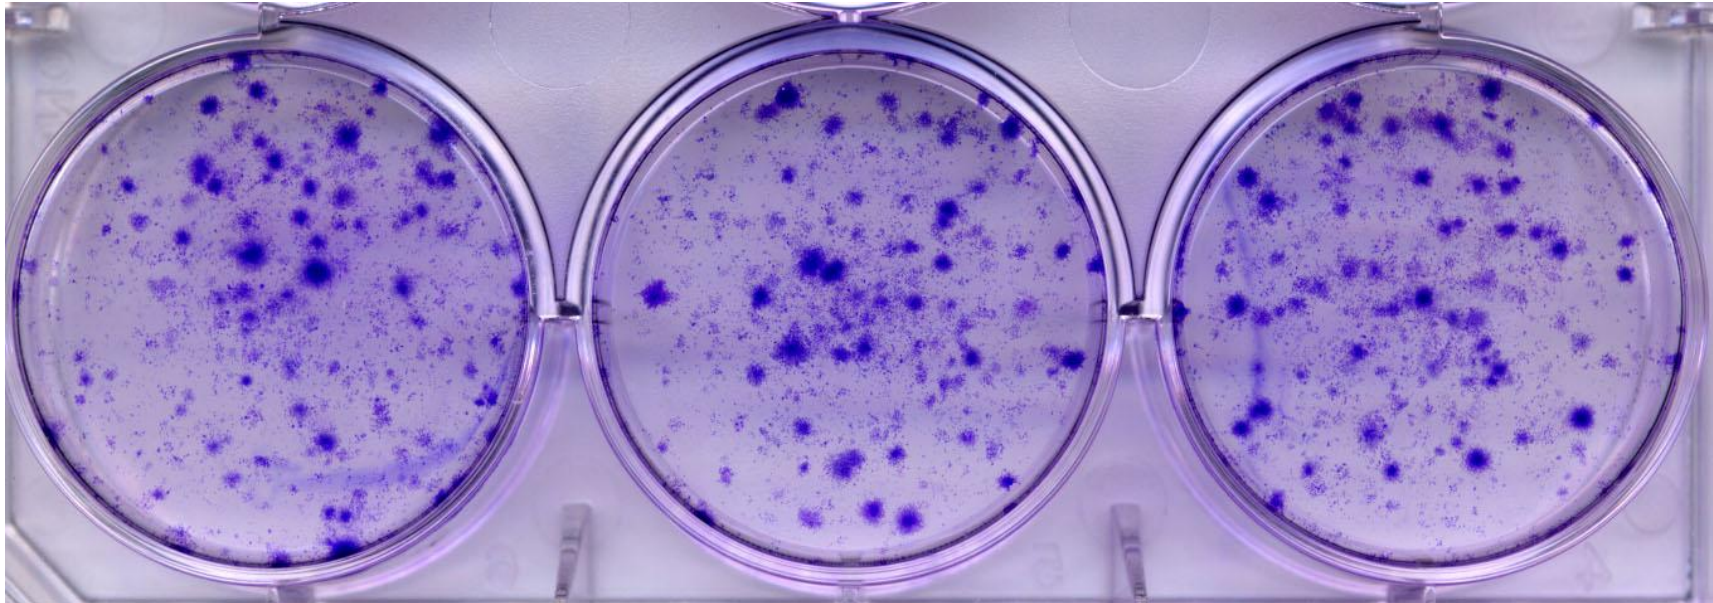



# HCF-1<sub>N1011Δ750-800</sub>

1st transfection

2nd transfection

3rd transfection

Permissive

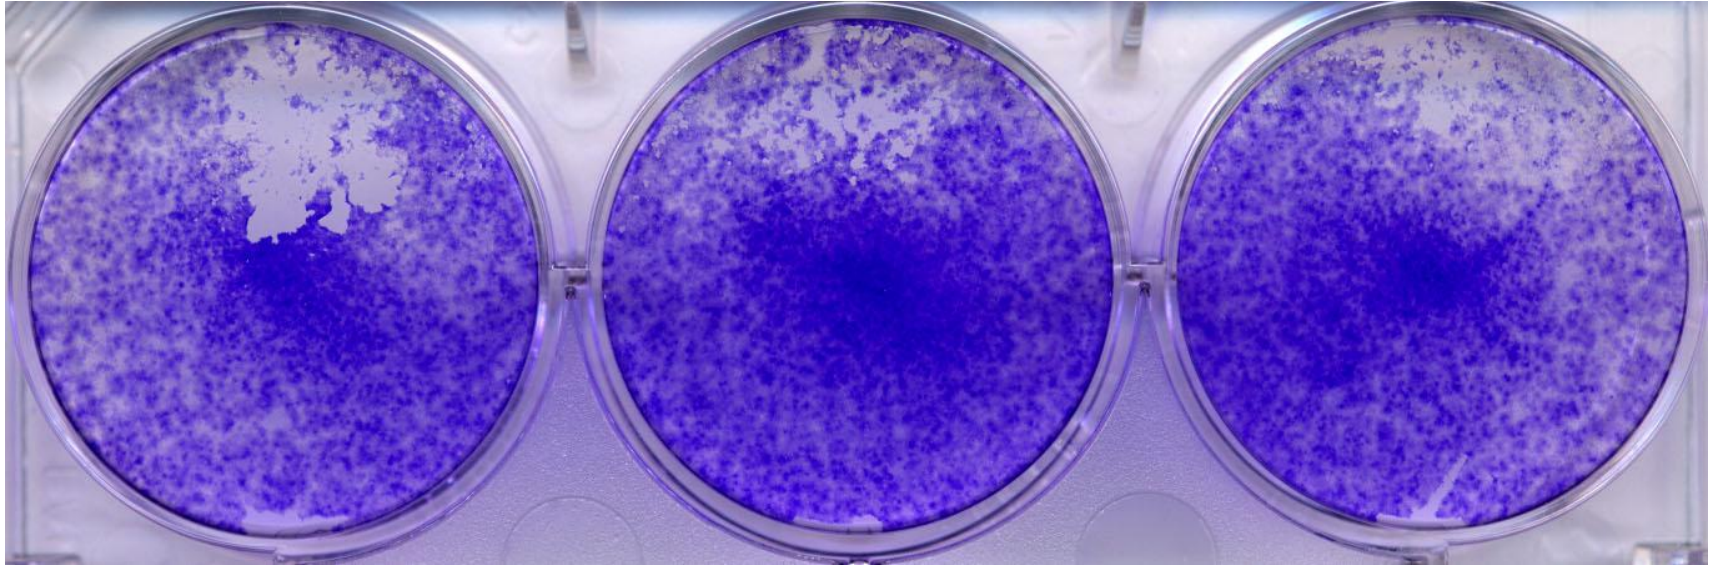

Non Permissive

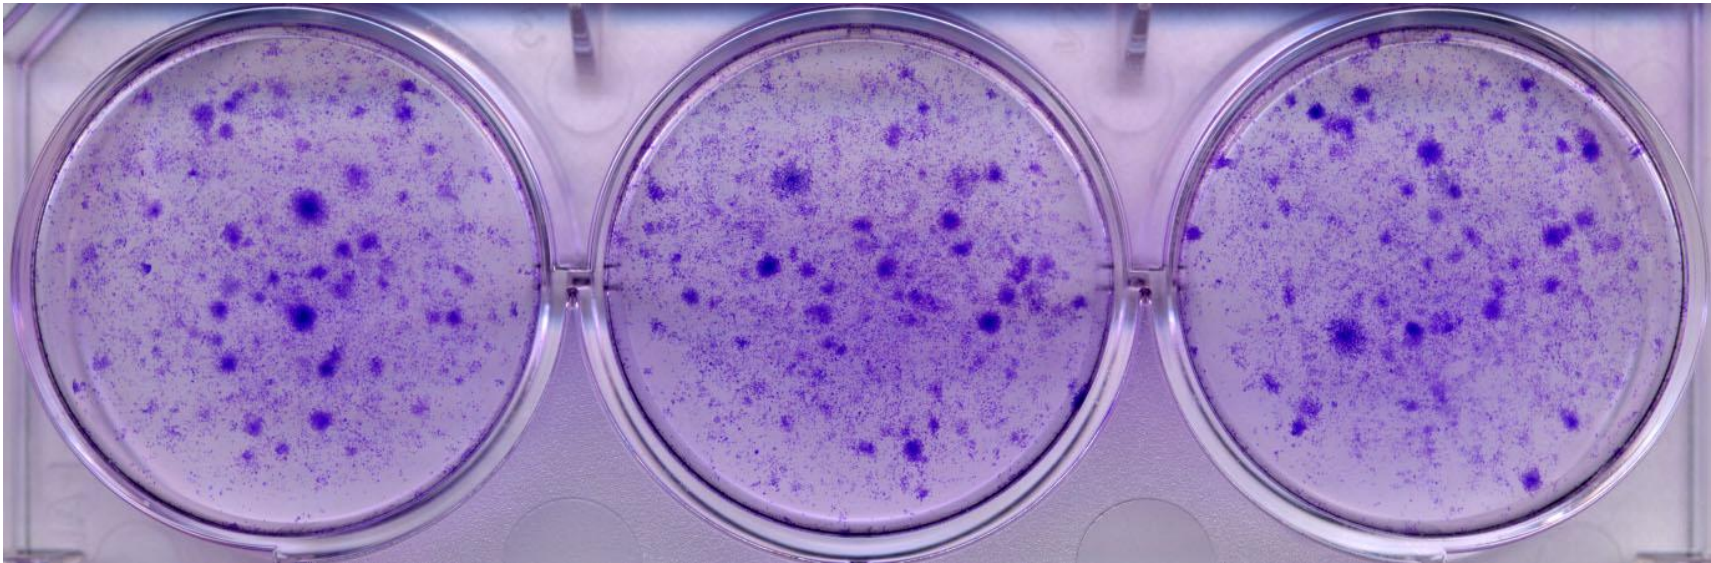

# HCF-1<sub>N1011Δ800-850</sub>

1st transfection

2nd transfection

3rd transfection

Permissive

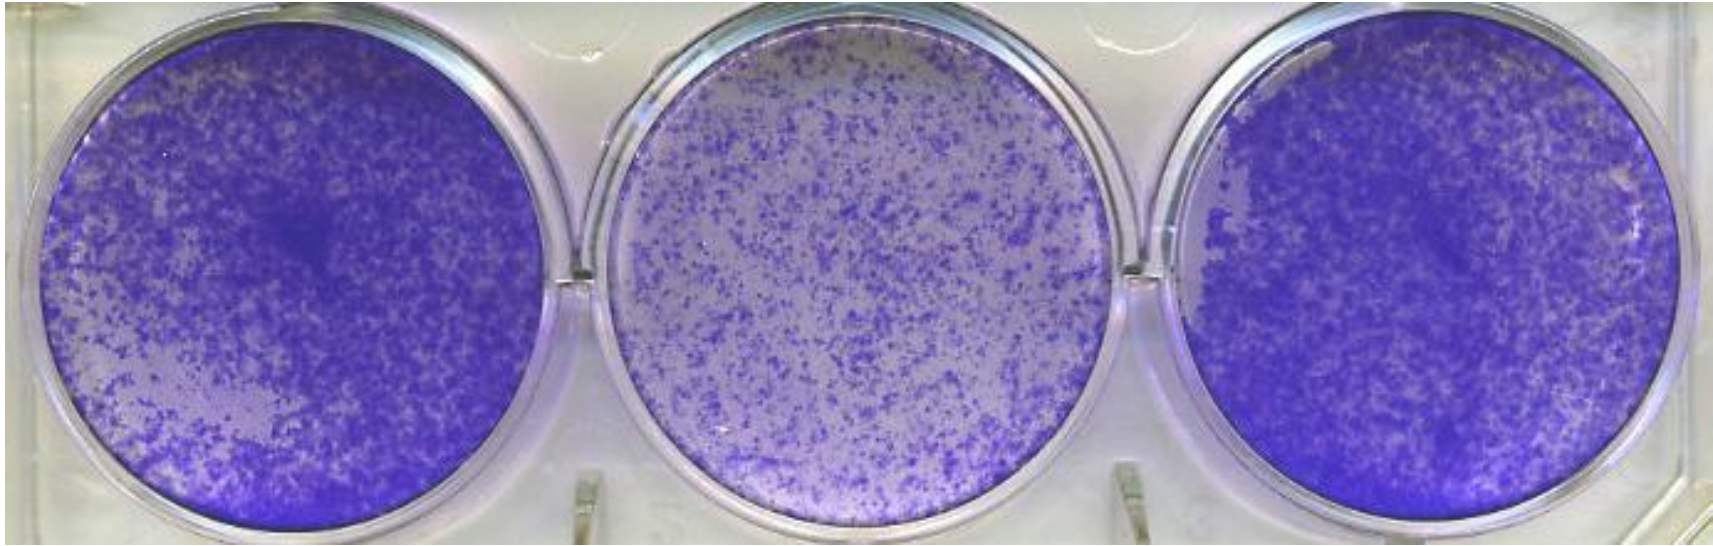

Non Permissive

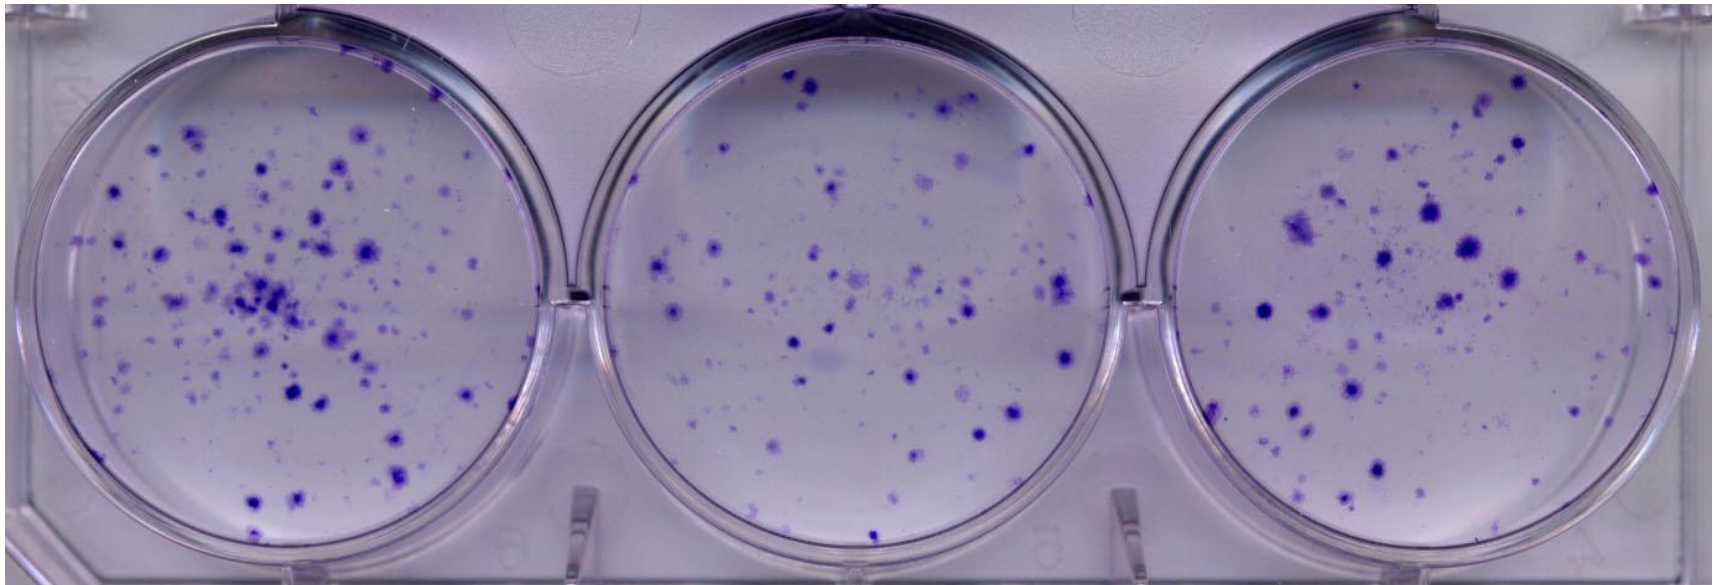

# HCF-1<sub>N1011Δ850-900</sub>

1st transfection

2nd transfection

3rd transfection

Permissive

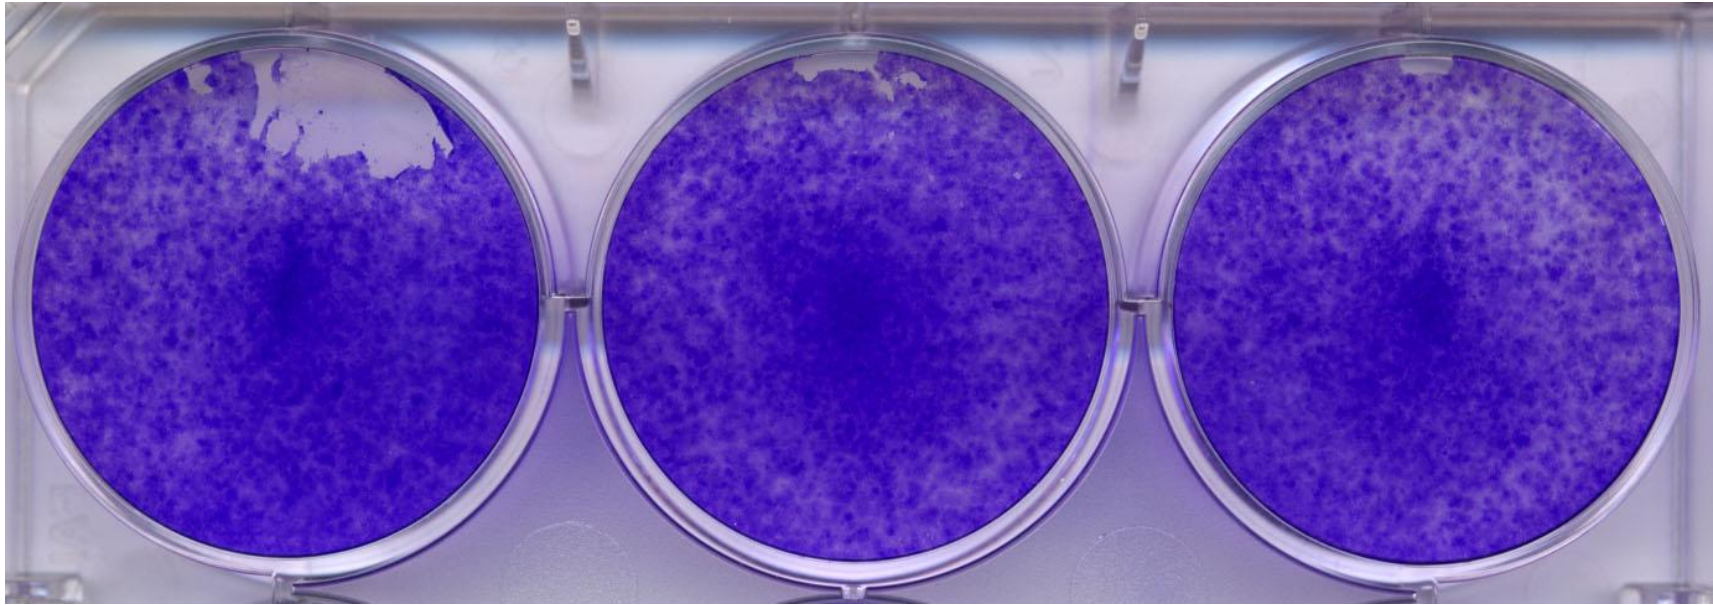

Non Permissive

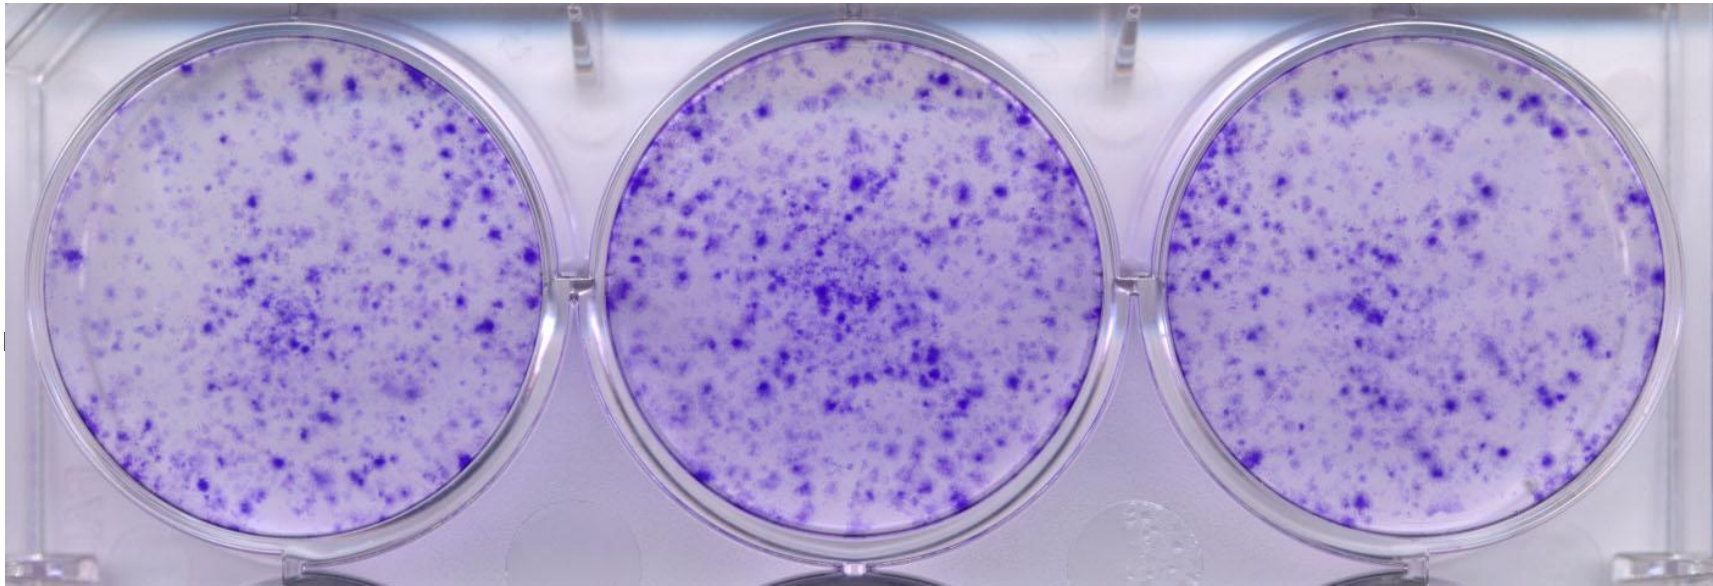

# HCF-1<sub>N1011Δ900-950</sub>

1st transfection

2nd transfection

3rd transfection

Permissive

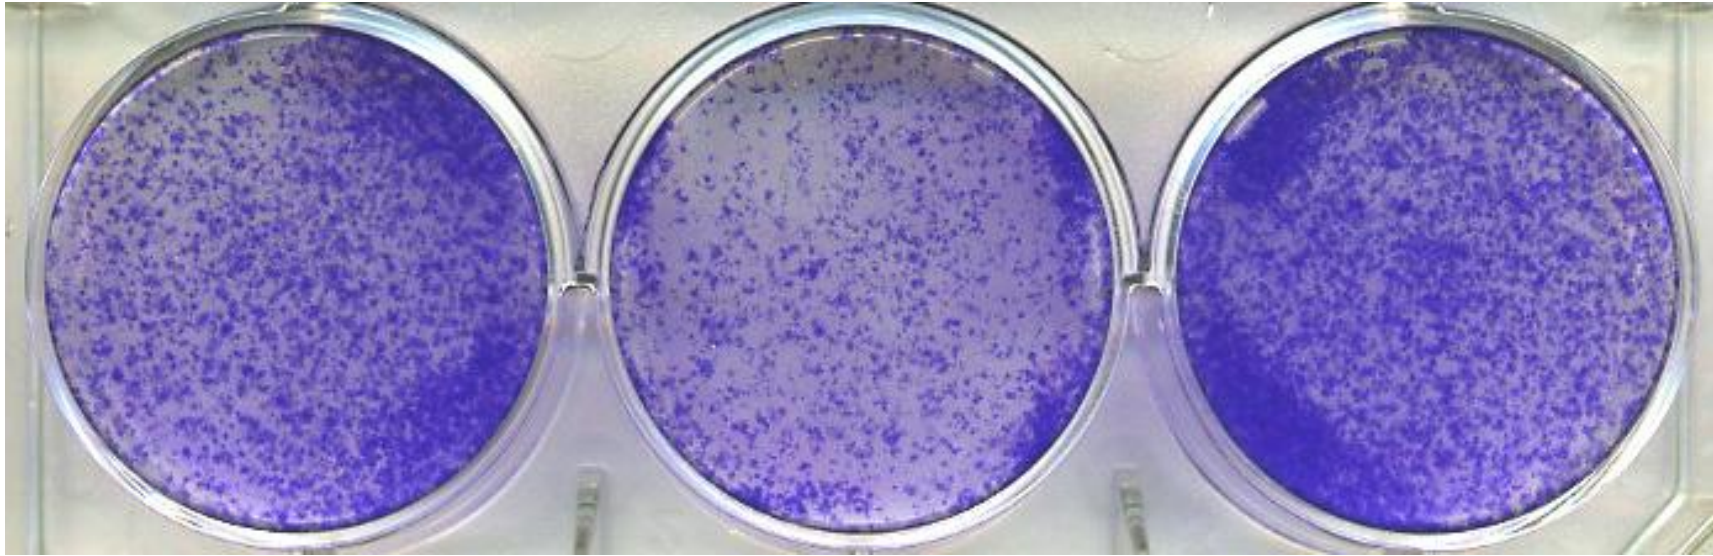

Non Permissive

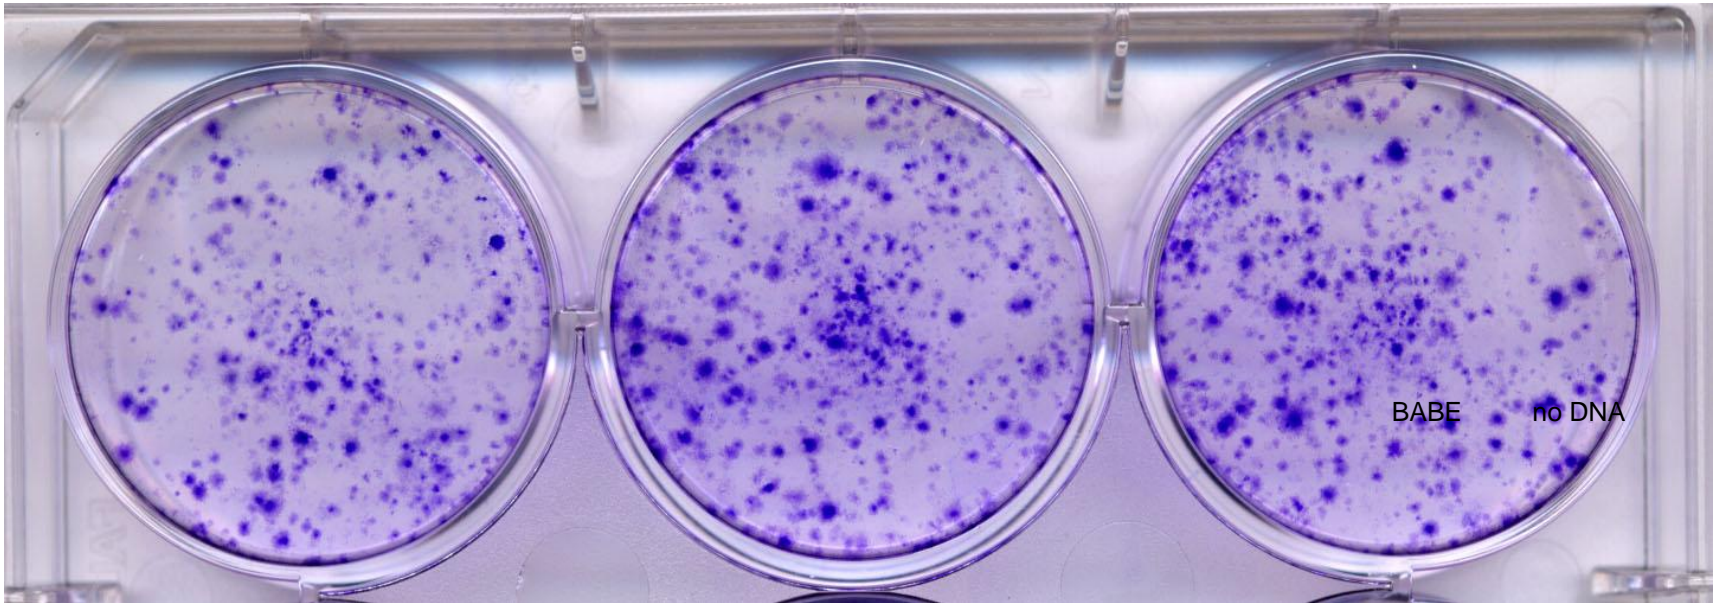

# HCF-1<sub>N1011Δ950-1000</sub>

1st transfection

2nd transfection

3rd transfection

Permissive

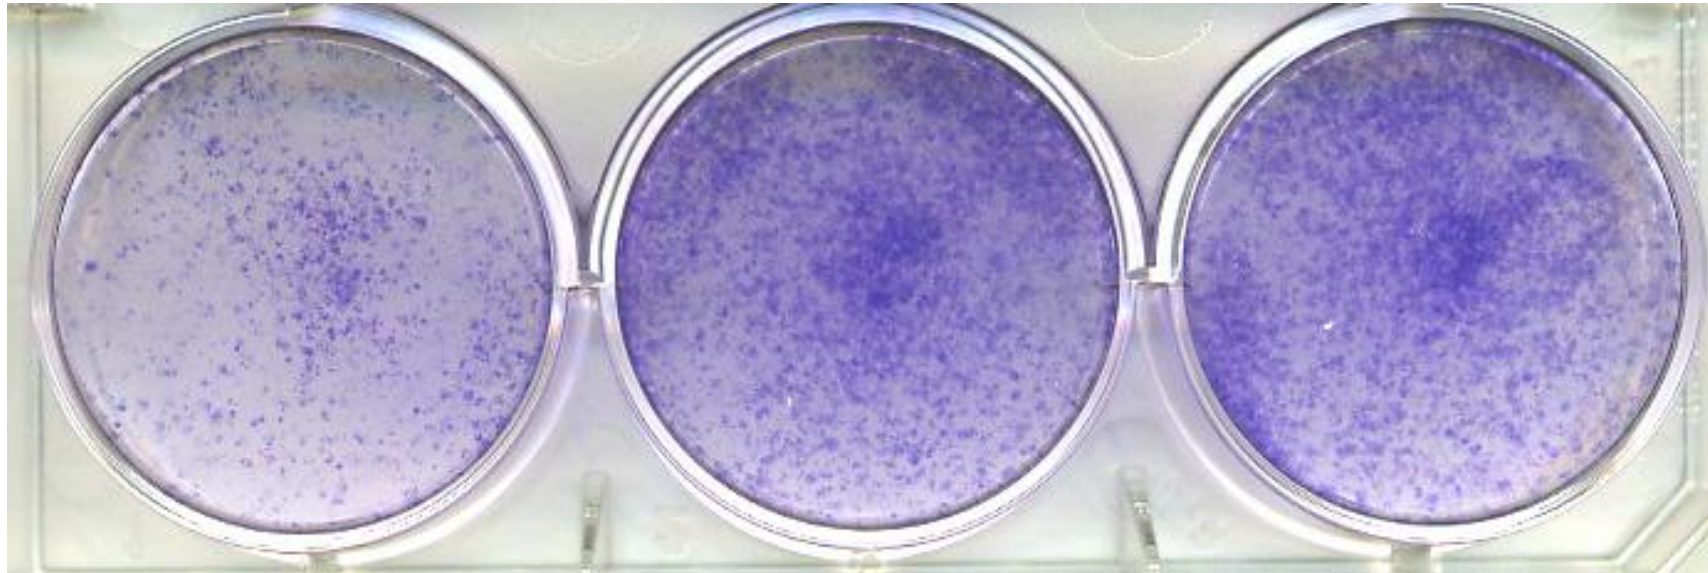

Non Permissive

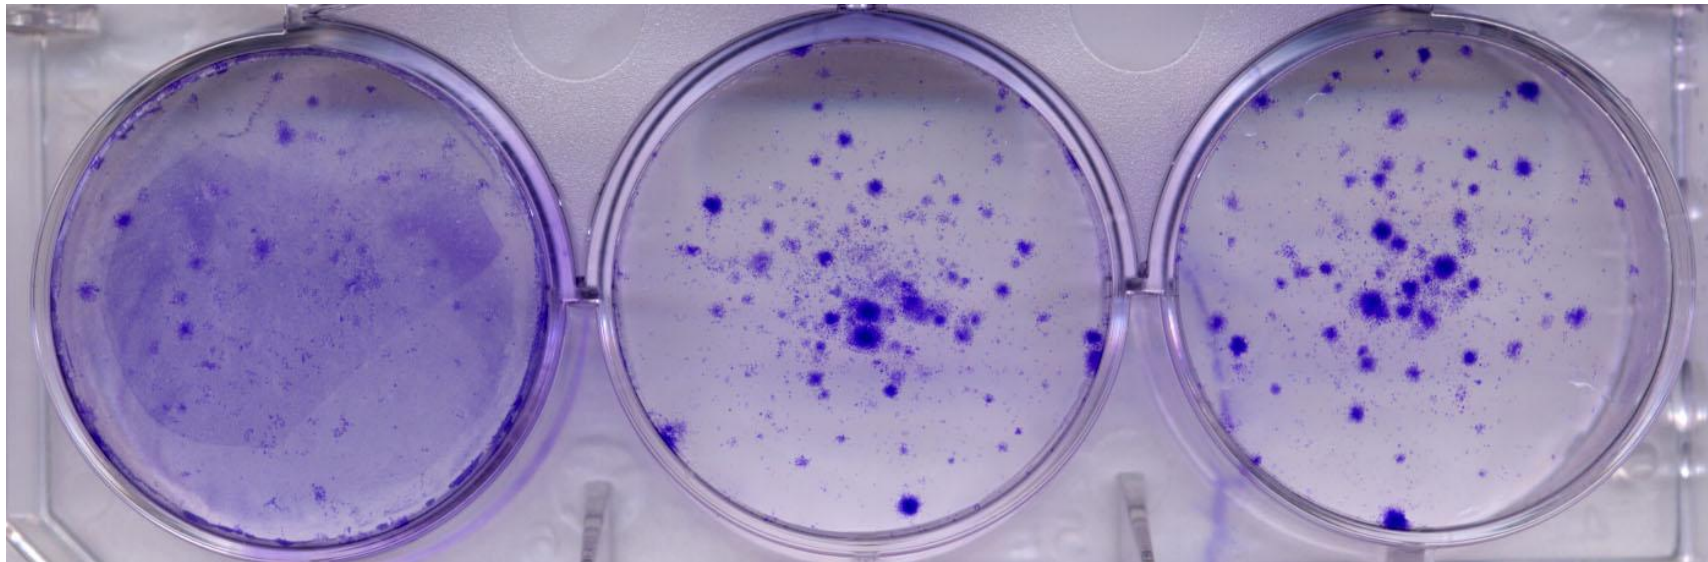

# HCF-1<sub>N1011Δ451-1000</sub>

1st transfection

2nd transfection

3rd transfection

Permissive

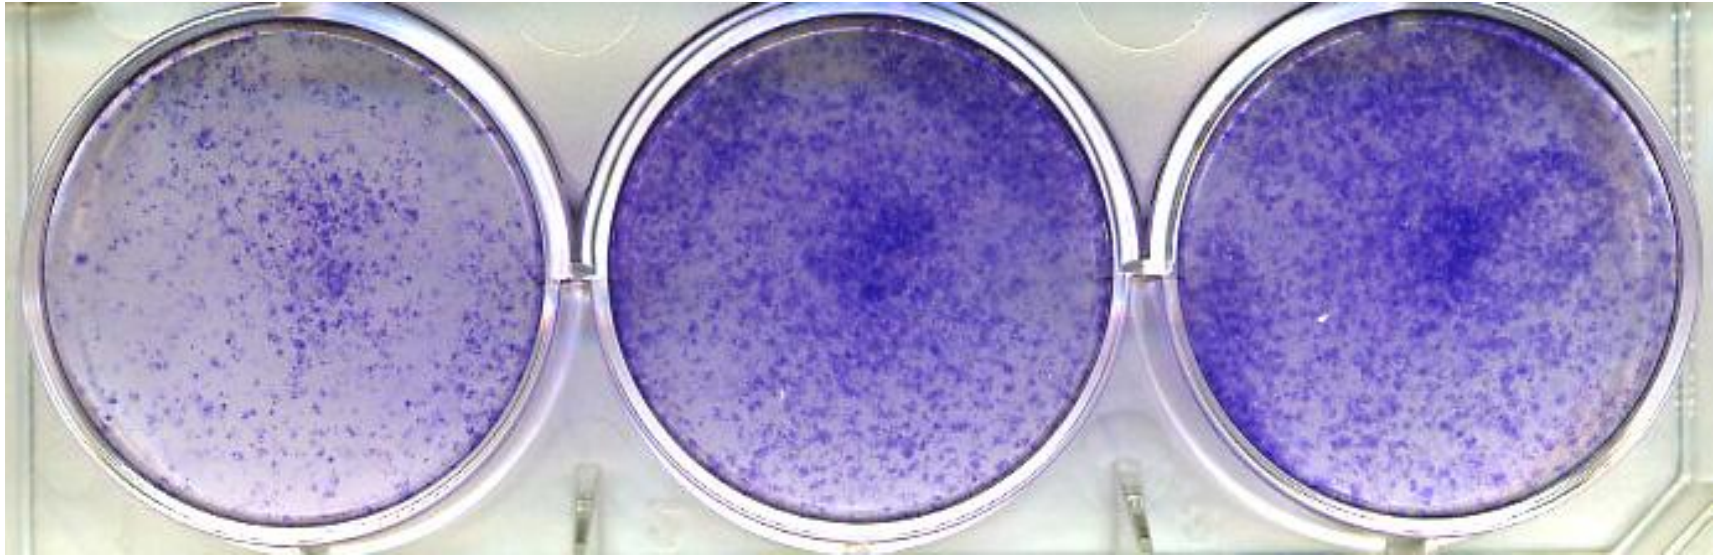

Non Permissive

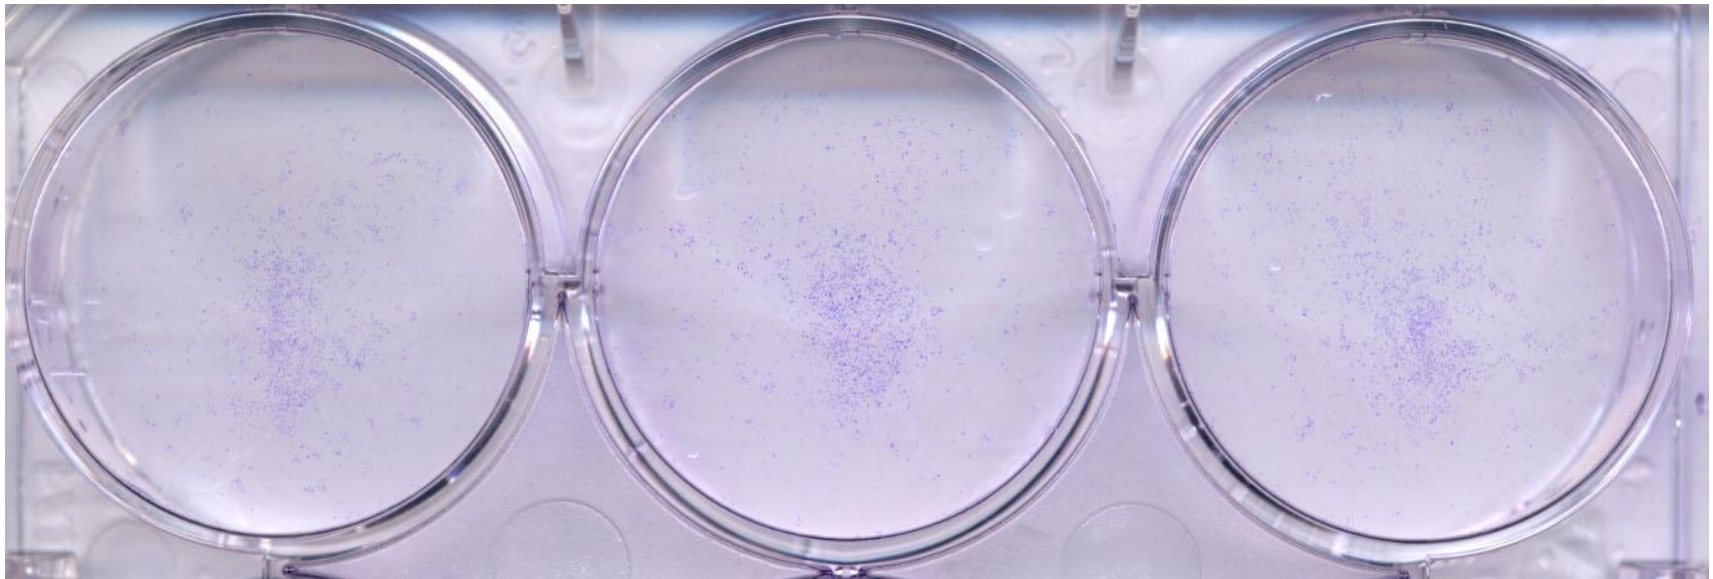

# HCF-1<sub>N1011Δ381-1000</sub>

1st transfection

2nd transfection

3rd transfection

Permissive

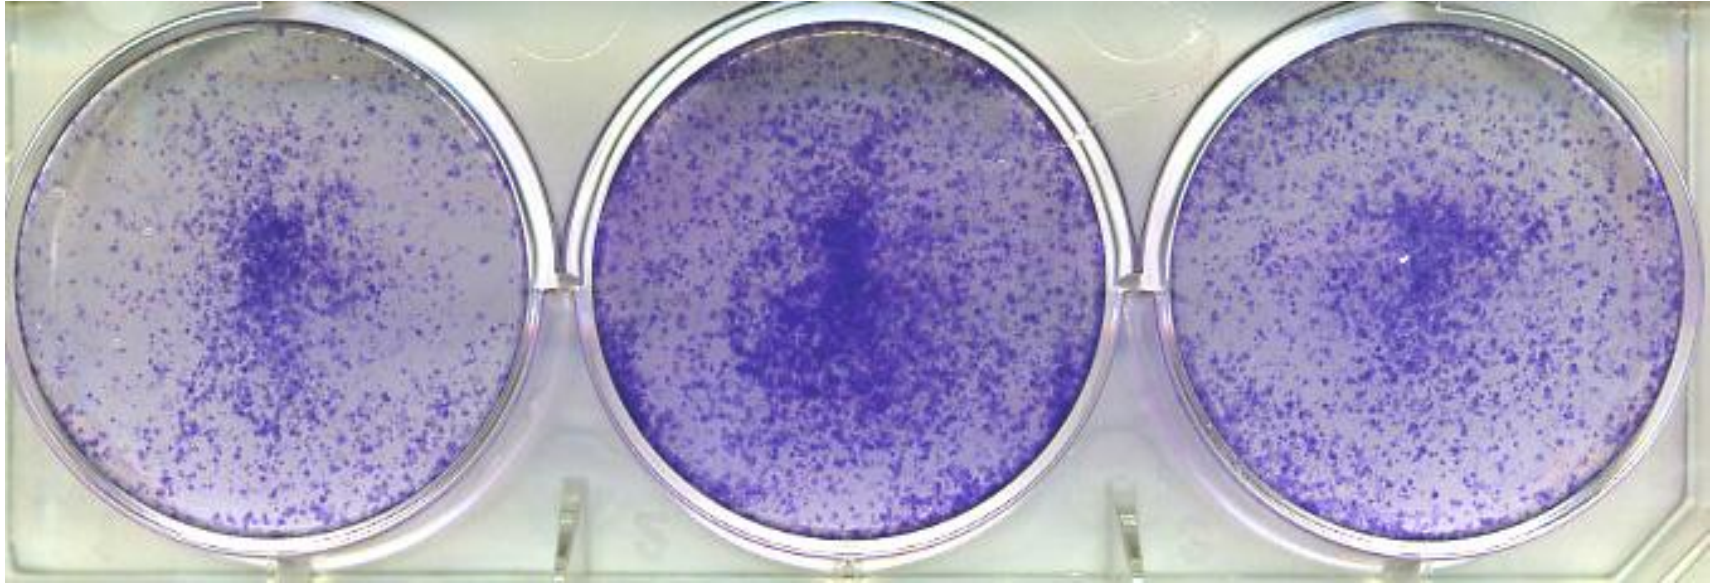

Non Permissive

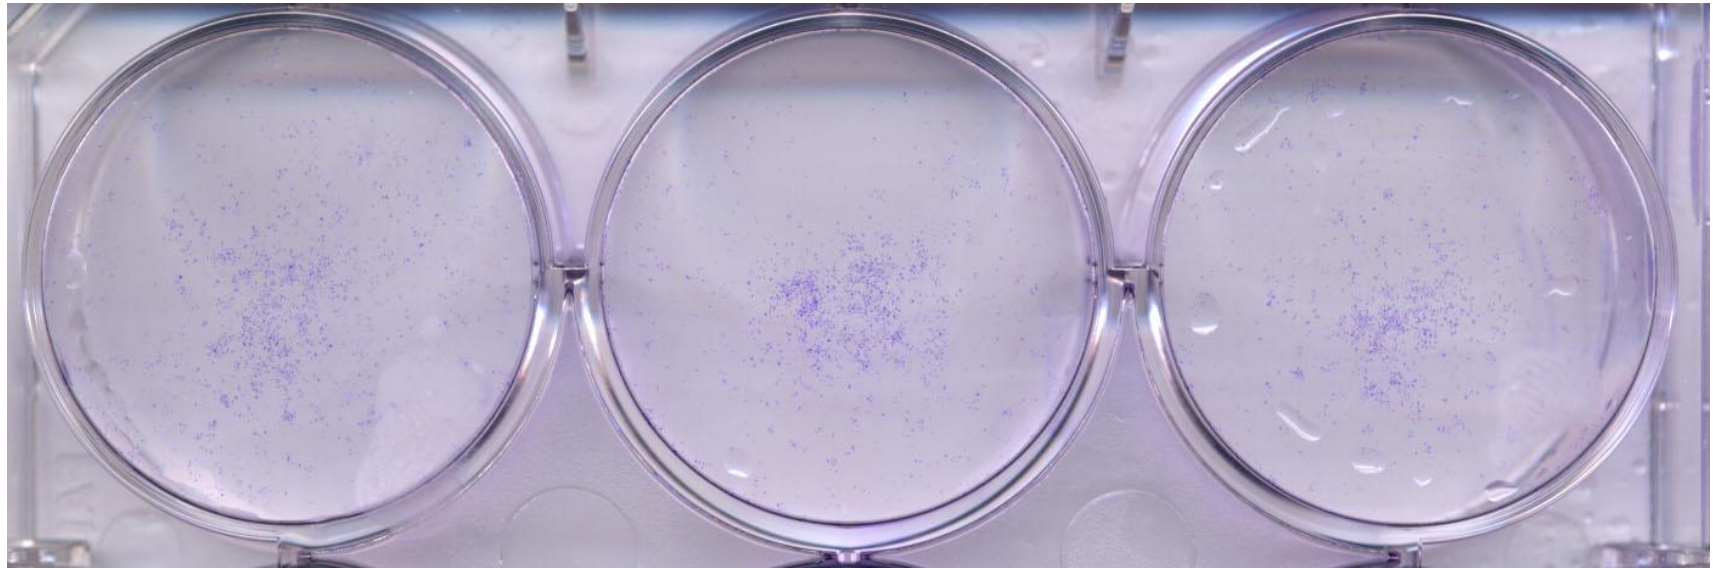

Empty vector

no DNA

Permissive

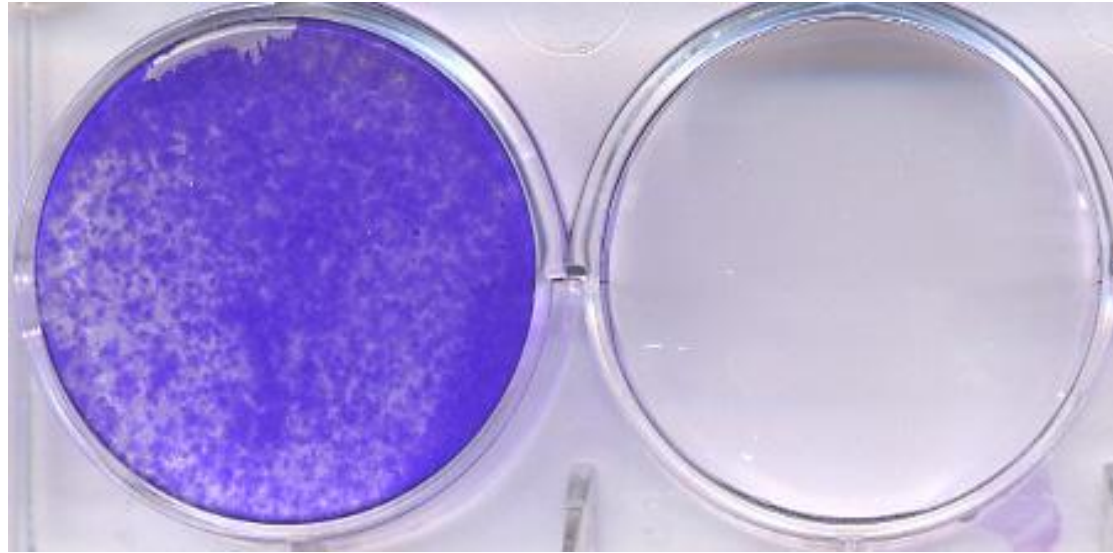

Non Permissive

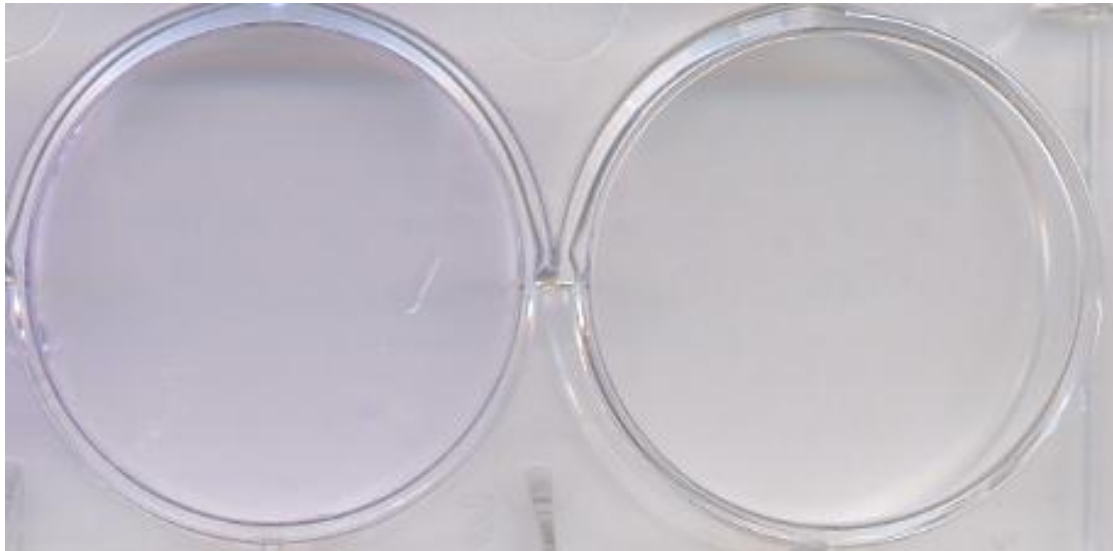

Supplement: pone.0009020.s002.pdf [file pone.0009020.s002.pdf]
