# Supplementary material for: Role of the HCF-1 Basic Region in Sustaining Cell Proliferation
Source: PubMed Central journal article supplement (PMC2814863; doi:10.1371/journal.pone.0009020), 2010-02-02

Supplemental Figure 3:  
tsBN67 colony assay with the  
duplication and deletion  
mutants

# Empty Vector

1st tranf.

2nd tranf.

3rd tranf.

Permissive

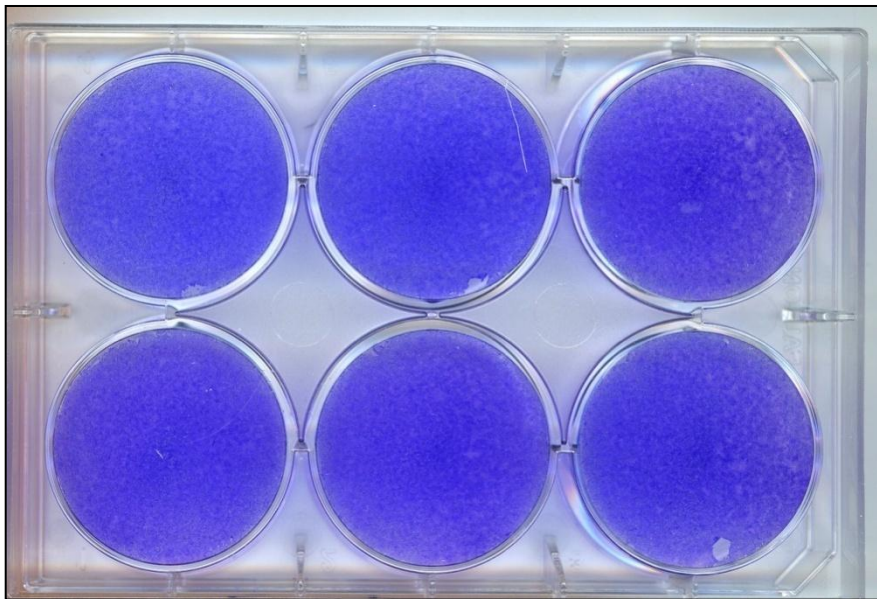

Non Permissive

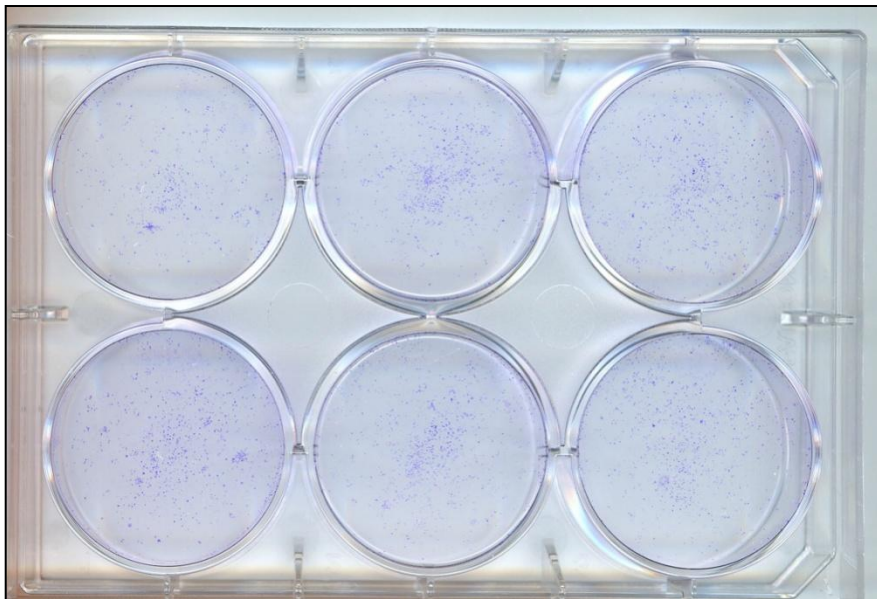

# pBABE\_GFP\_noPuro

1st tranf.

2nd tranf.

3rd tranf.

Permissive

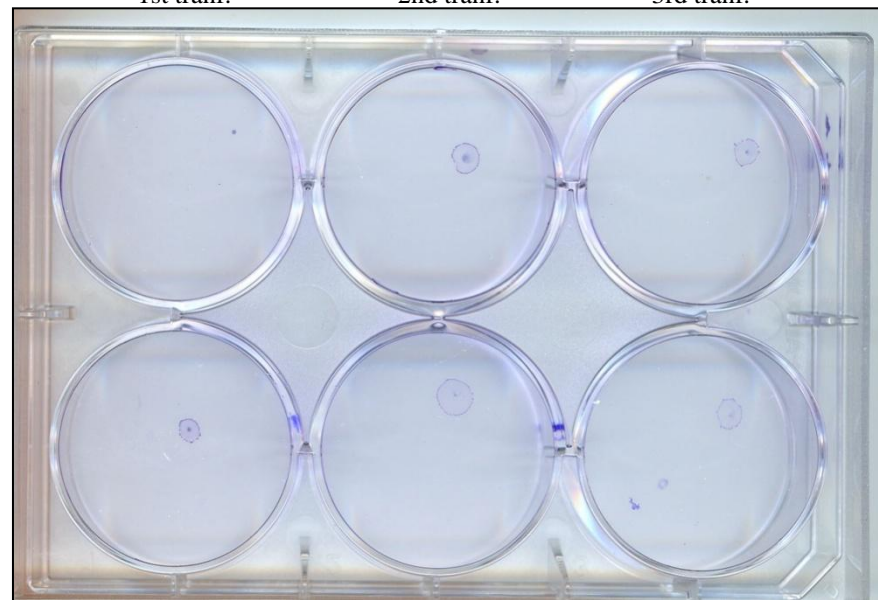

Non Permissive

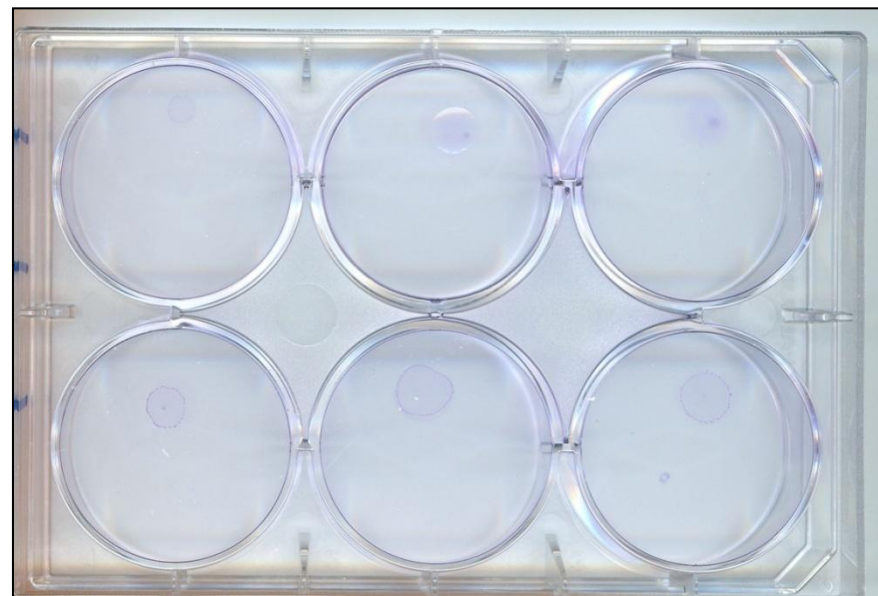

# HCF-1<sub>N1011Δ381-1000</sub>

# HCF-1<sub>N1011Δ451-1000</sub>

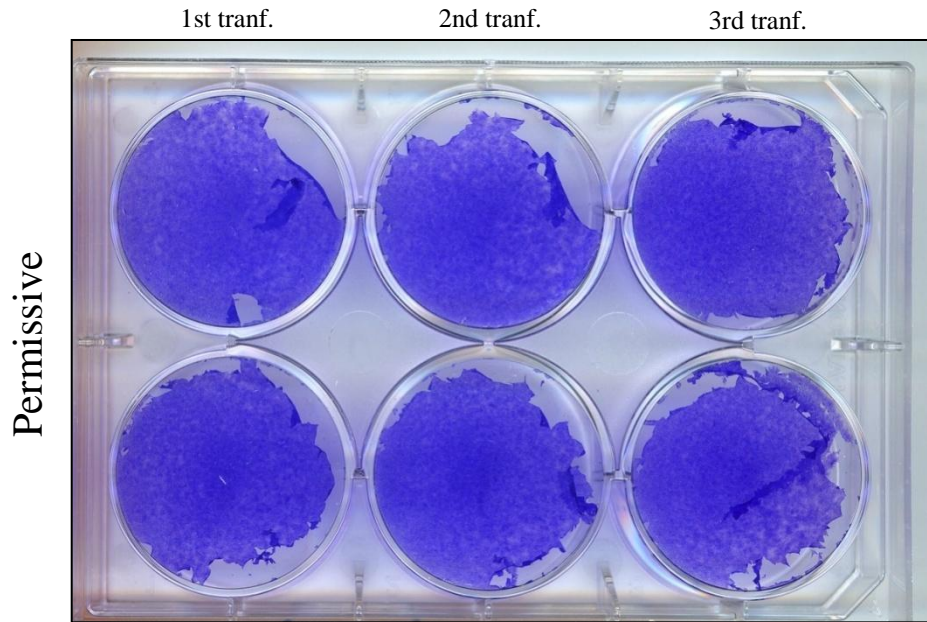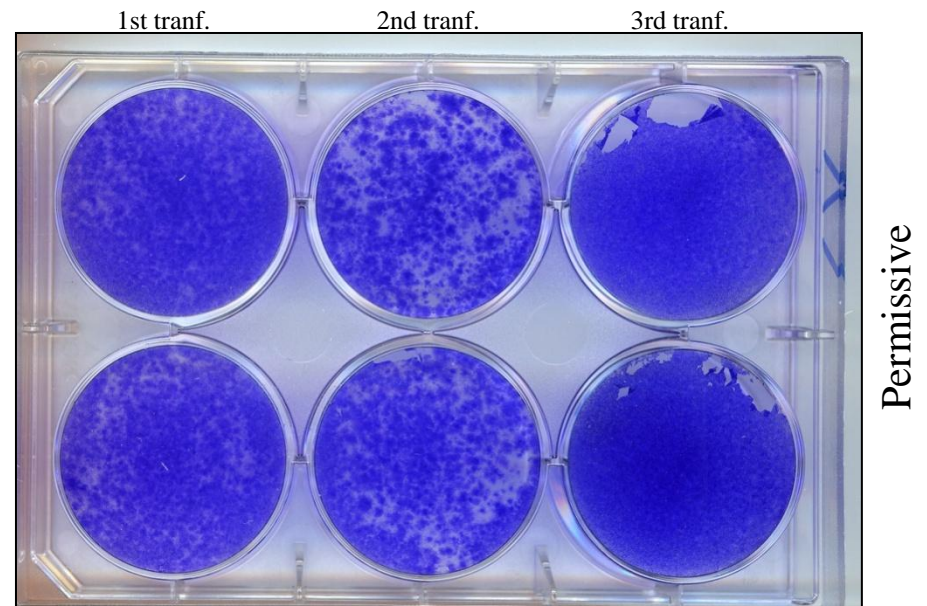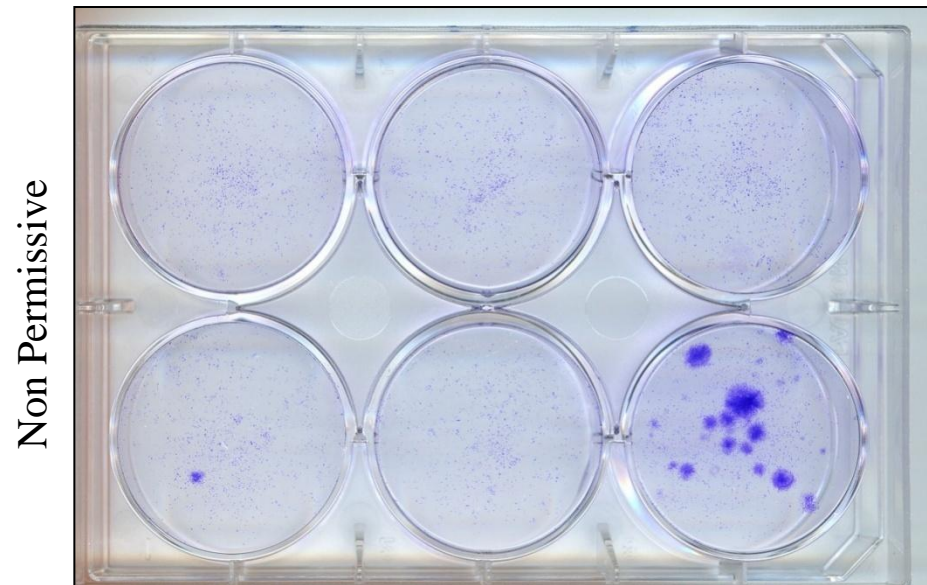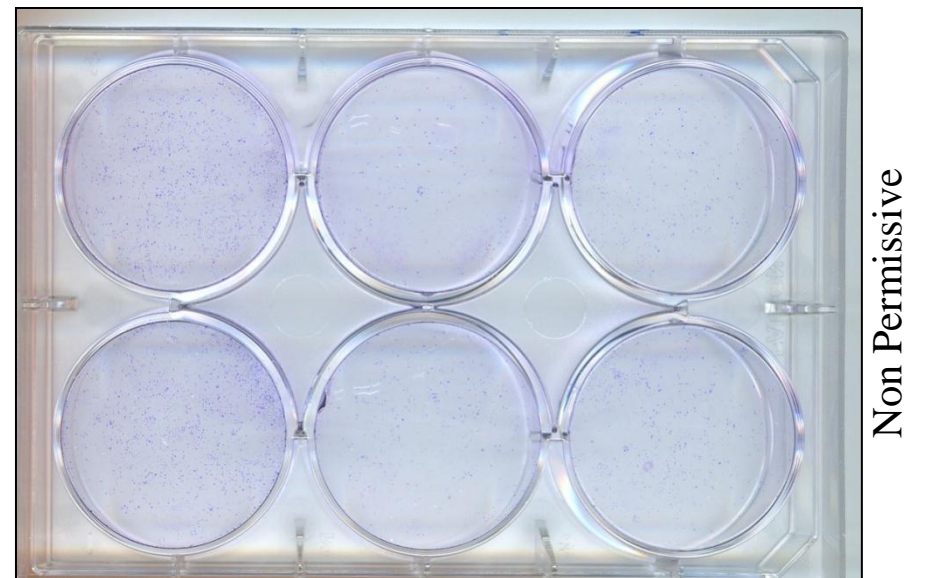

# HCF-1<sub>N1011(D1)</sub>

1st tranf.

2nd tranf.

3rd tranf.

Permissive

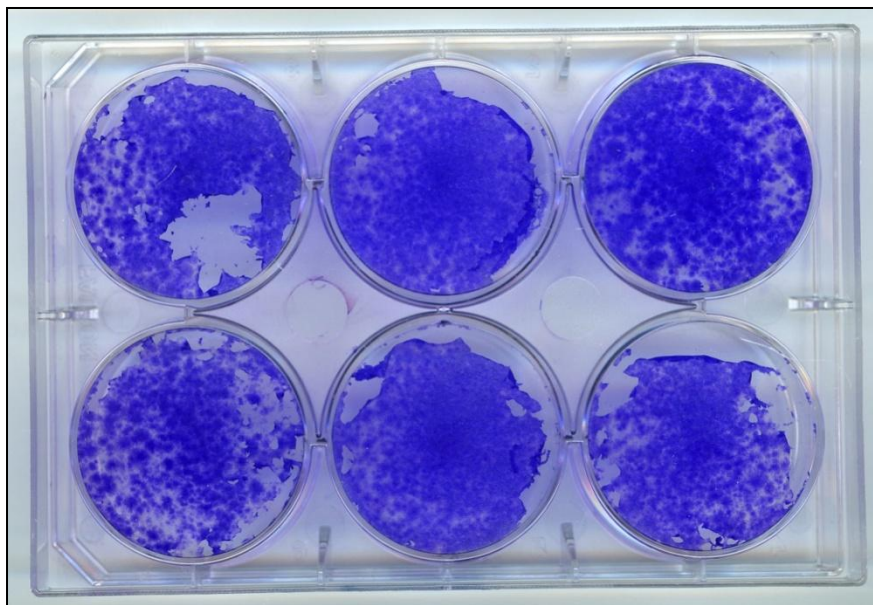

Non Permissive

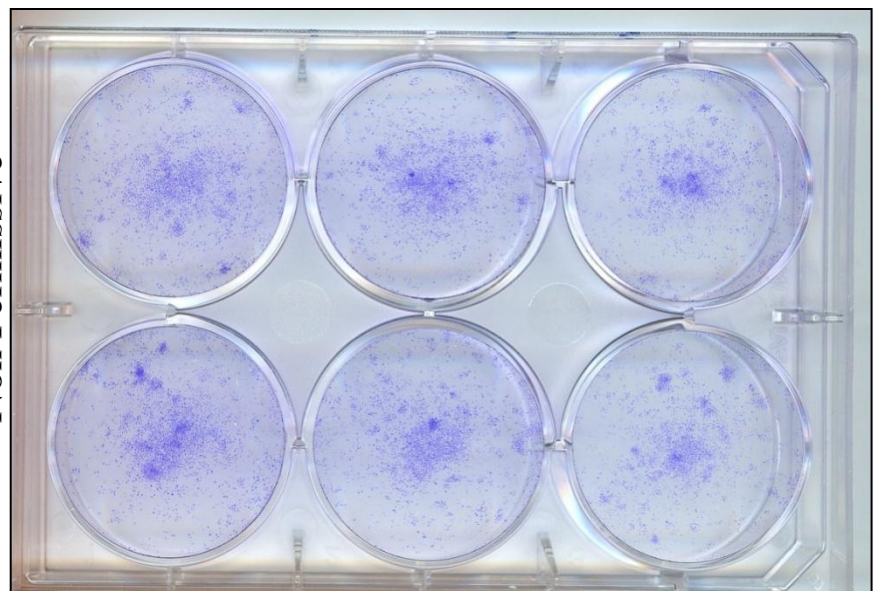

# HCF-1<sub>N1011(D11)</sub>

1st tranf.

2nd tranf.

3rd tranf.

Permissive

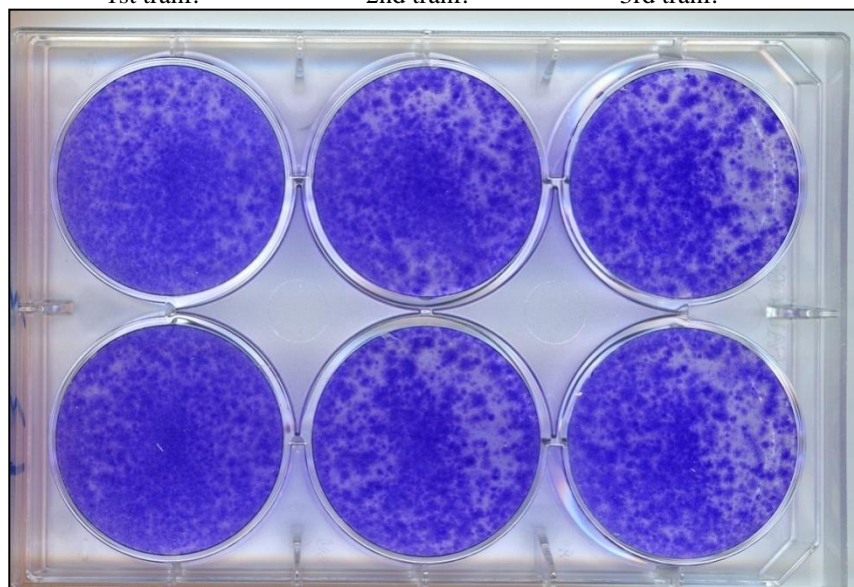

Non Permissive

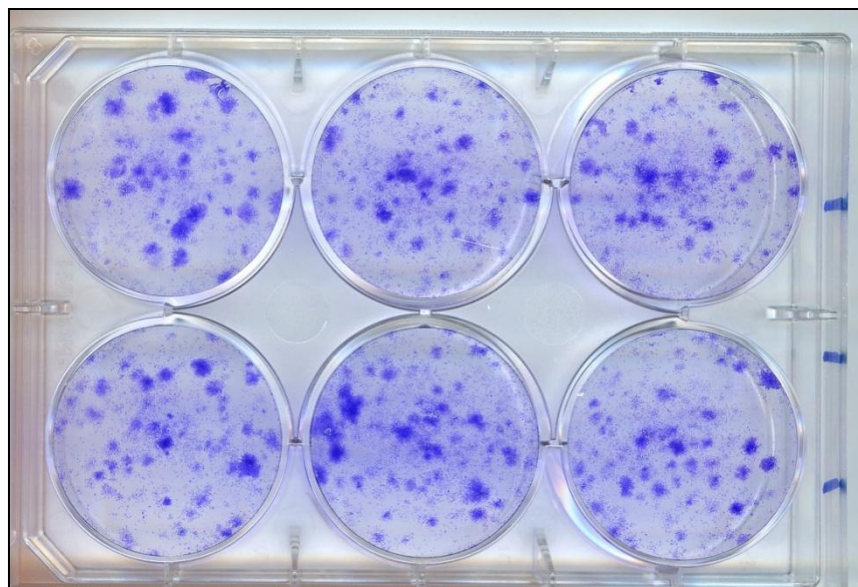

# HCF-1<sub>N1011(D2)</sub>

1st tranf.

2nd tranf.

3rd tranf.

Permissive

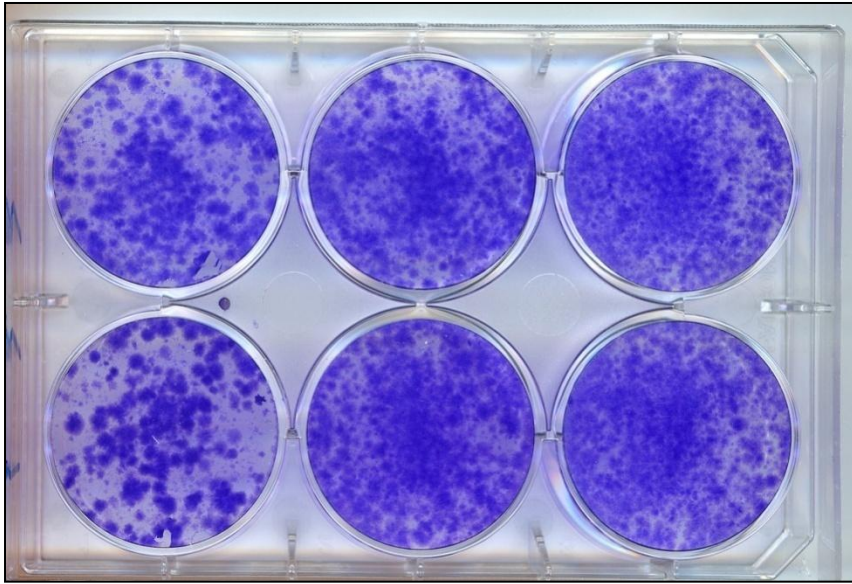

Non Permissive

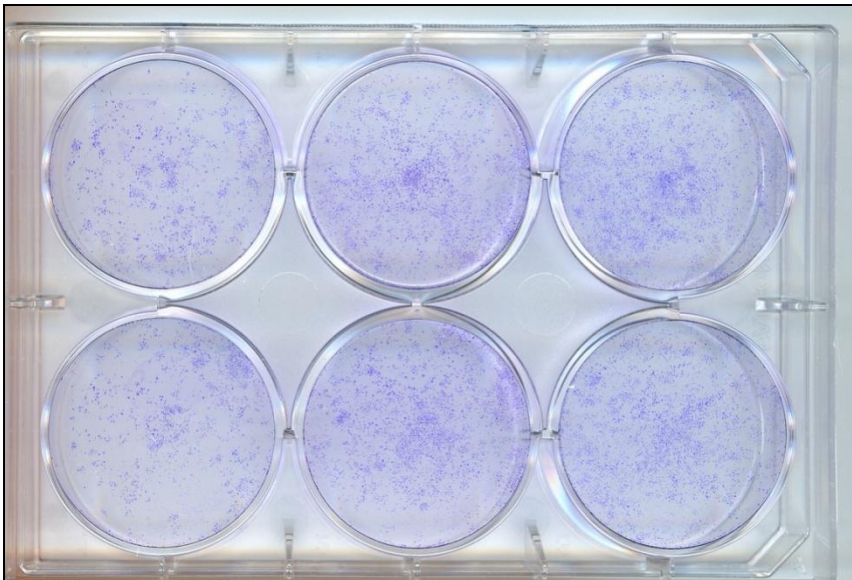

# HCF-1<sub>N1011(D22)</sub>

1st tranf.

2nd tranf.

3rd tranf.

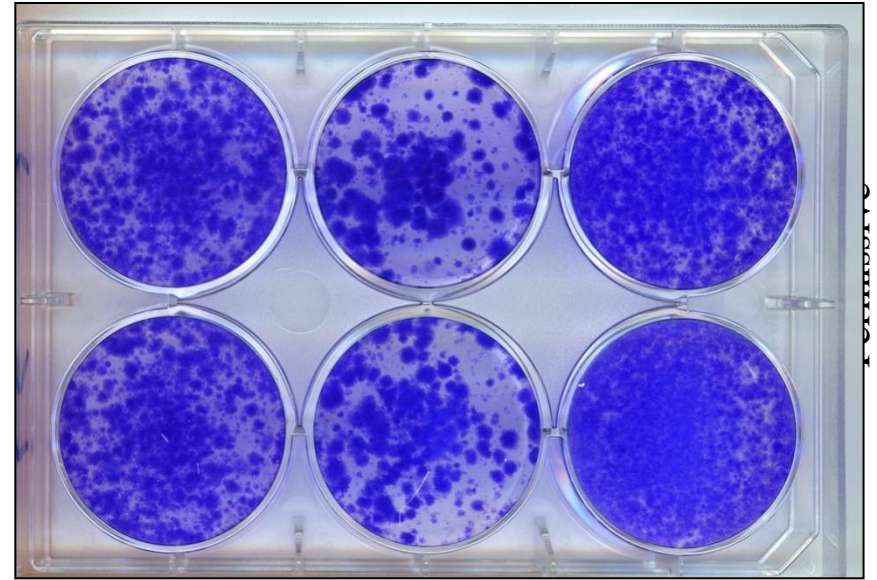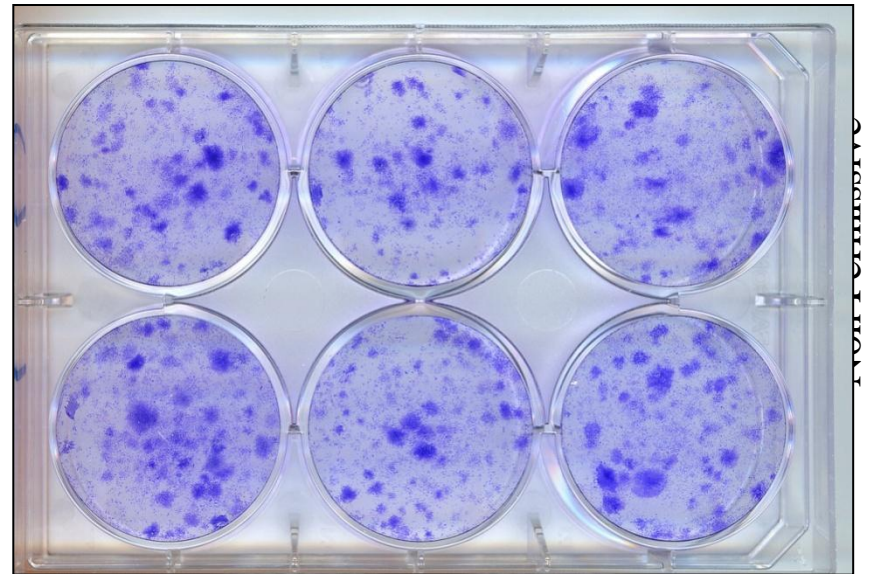

# HCF-1<sub>N1011(D21)</sub>

1st tranf.

2nd tranf.

3rd tranf.

Permissive

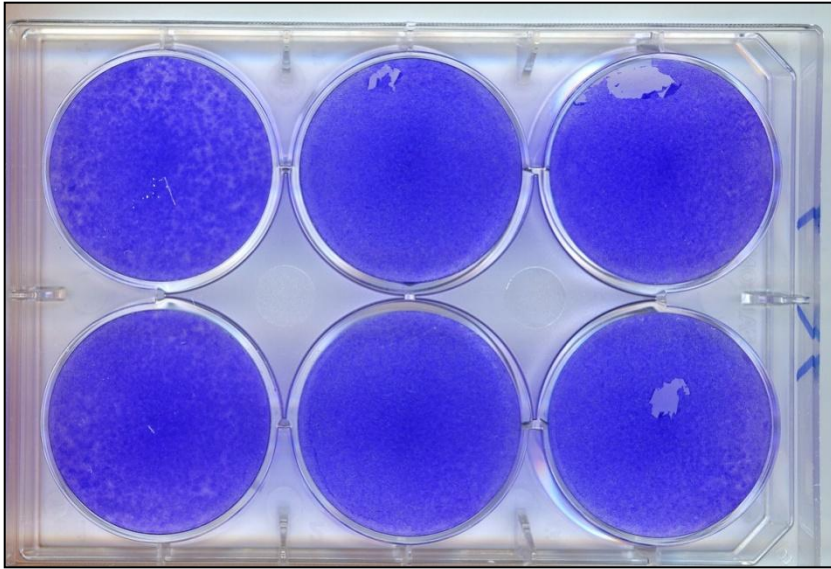

Non Permissive

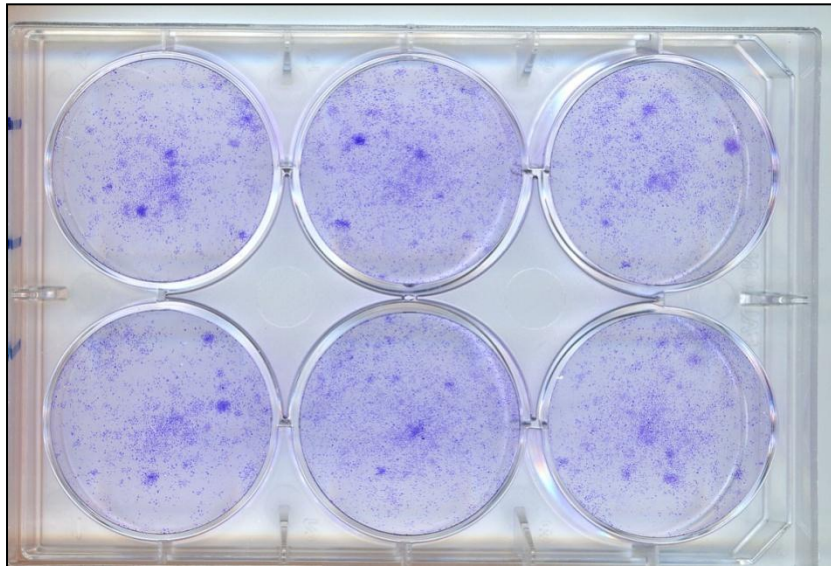

# HCF-1<sub>N1011</sub>

1st tranf.

2nd tranf.

3rd tranf.

Permissive

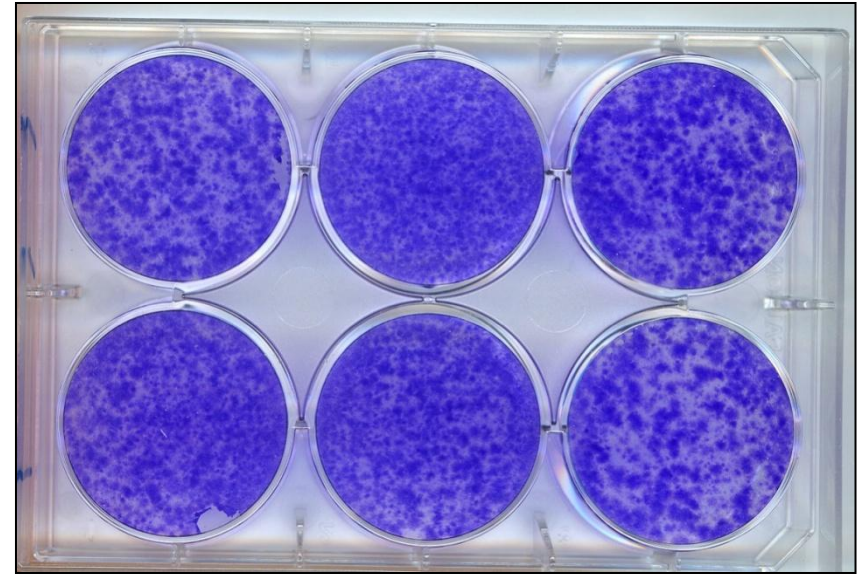

Non Permissive

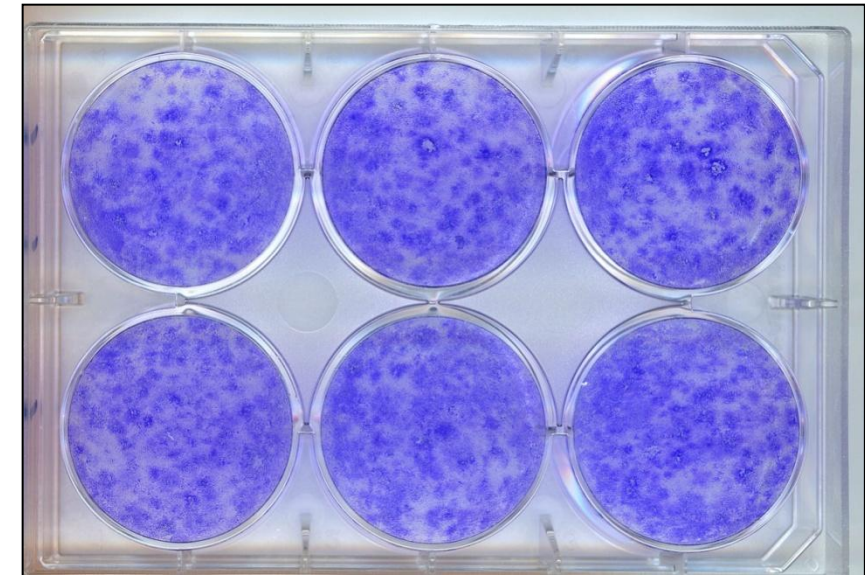

Supplement: pone.0009020.s004.pdf [file pone.0009020.s004.pdf]
