# Supplementary material for: Role of the HCF-1 Basic Region in Sustaining Cell Proliferation
Source: PubMed Central journal article supplement (PMC2814863; doi:10.1371/journal.pone.0009020), 2010-02-02
Supplement: pone.0009020.s003.pdf [file pone.0009020.s003.pdf]

Supplemental Figure 2:  
tsBN67 colony assay with the N- and C-  
terminal deletion mutants

# HCF-1<sub>N1011Δ451-500</sub>

1<sup>st</sup> transfection

2<sup>nd</sup> transfection

3<sup>rd</sup> transfection

permissive

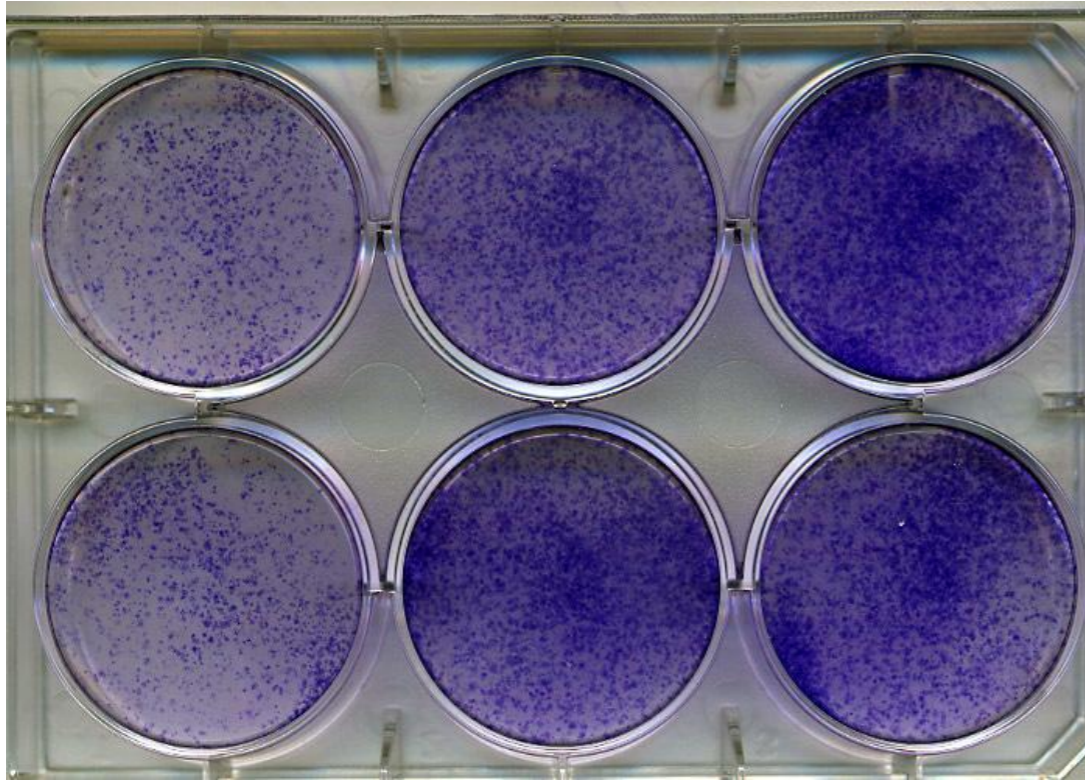

Non permissive

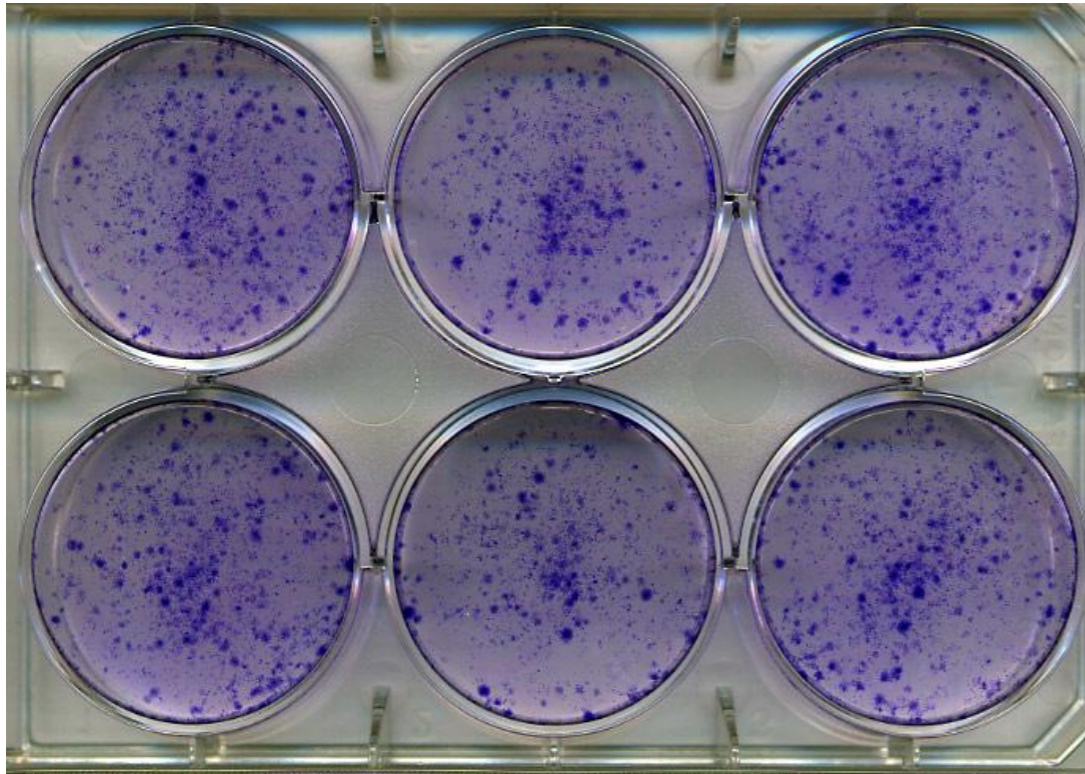

# HCF-1<sub>N1011Δ451-550</sub>

1<sup>st</sup> transfection

2<sup>nd</sup> transfection

3<sup>rd</sup> transfection

2

permissive

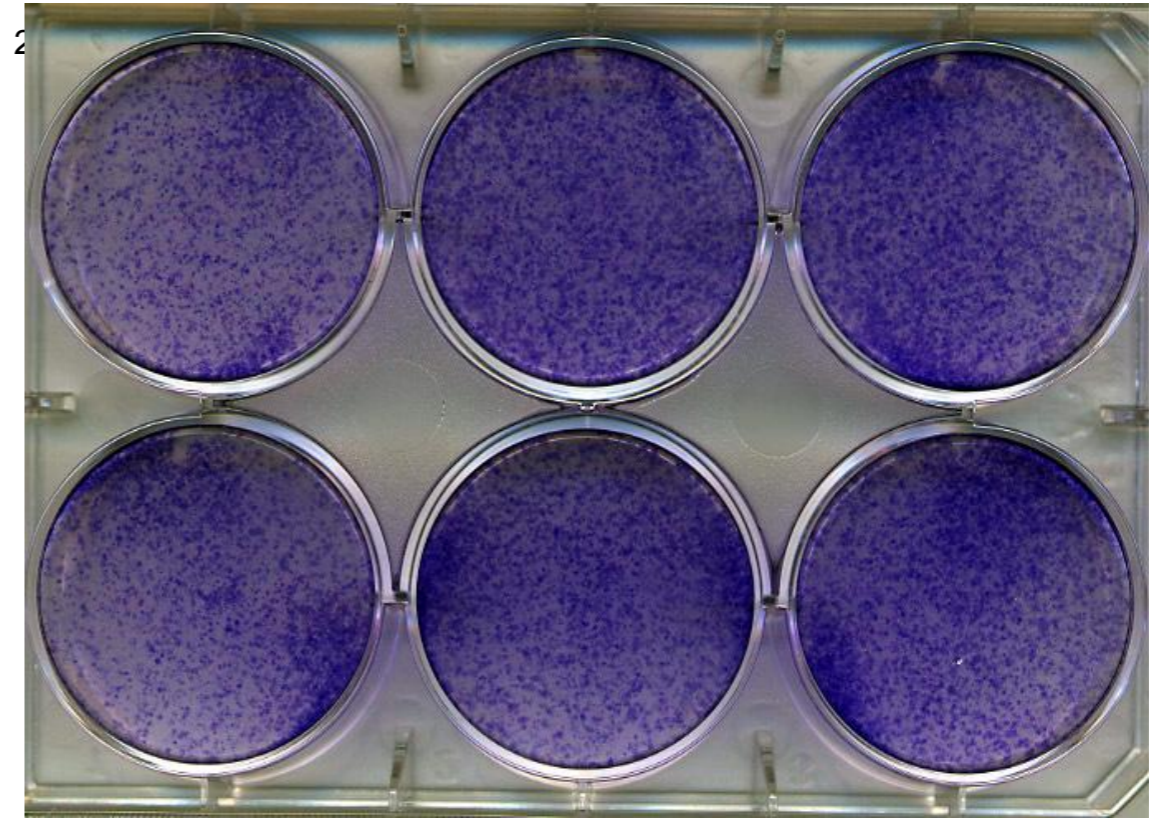

Non permissive

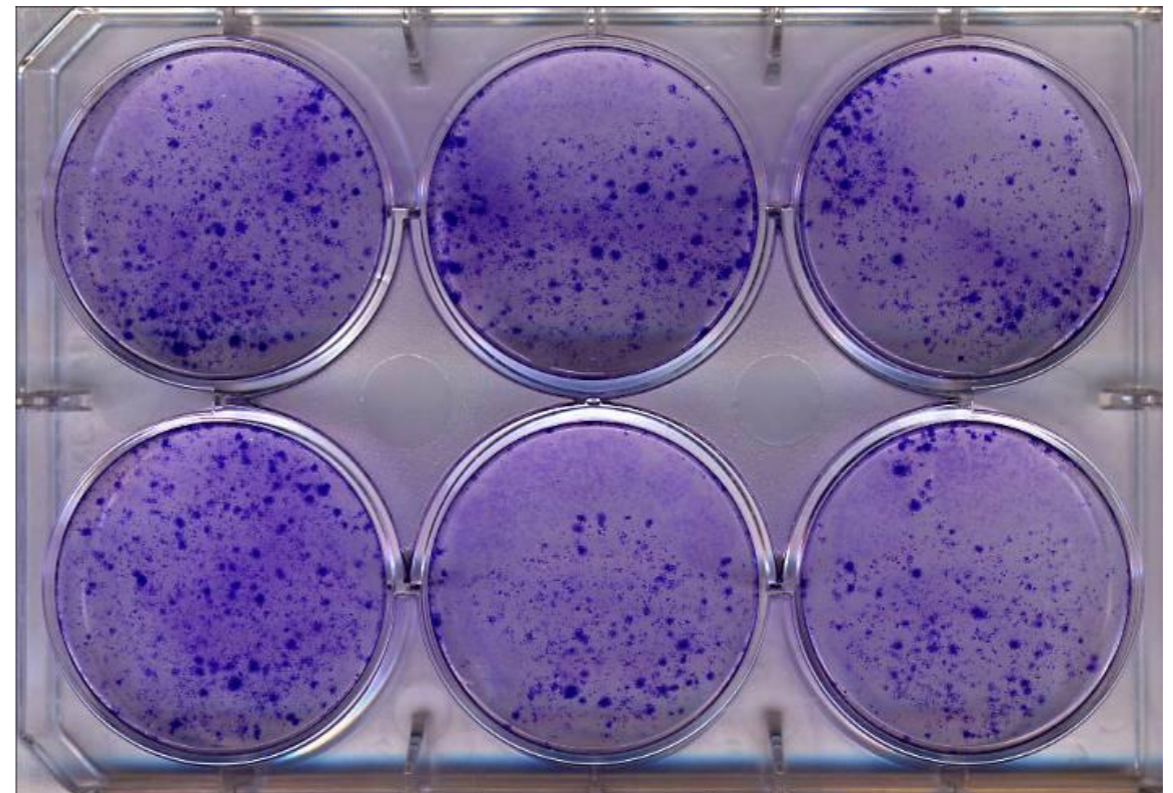

# HCF-1<sub>N1011Δ451-650</sub>

1<sup>st</sup> transfection

2<sup>nd</sup> transfection

3<sup>rd</sup> transfection

permissive

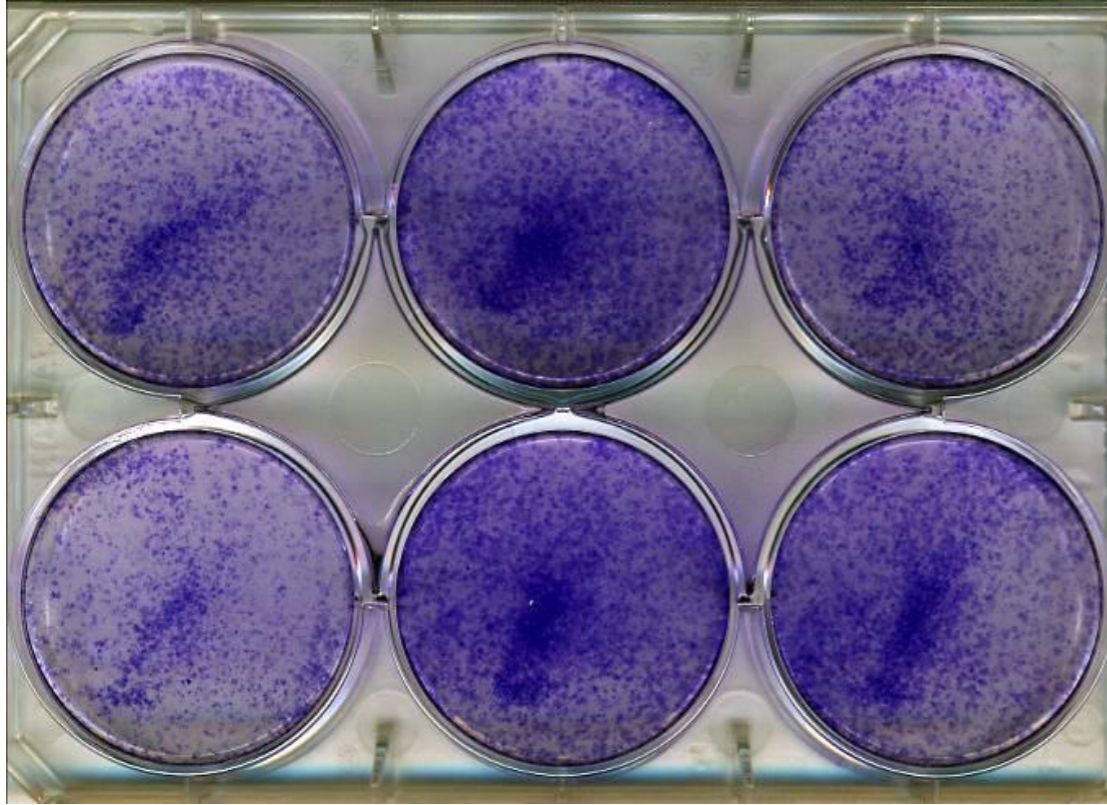

Non permissive

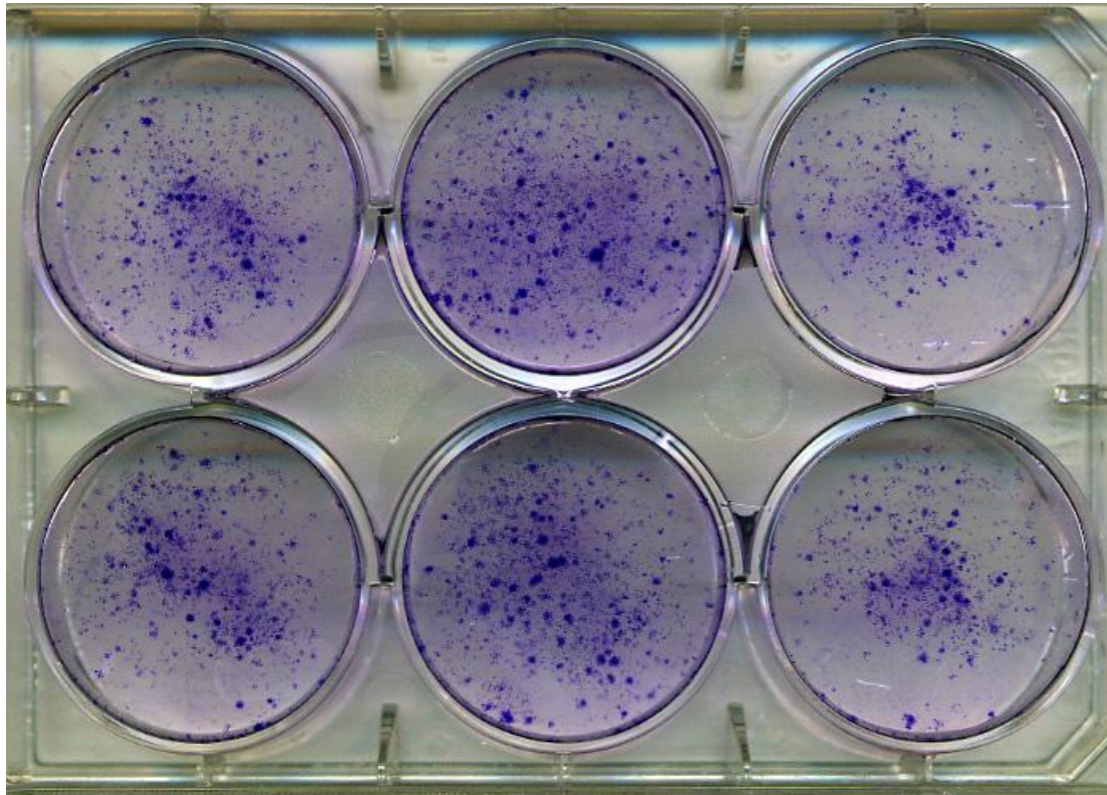

# HCF-1<sub>N1011Δ451-700</sub>

1<sup>st</sup> transfection

2<sup>nd</sup> transfection

3<sup>rd</sup> transfection

2

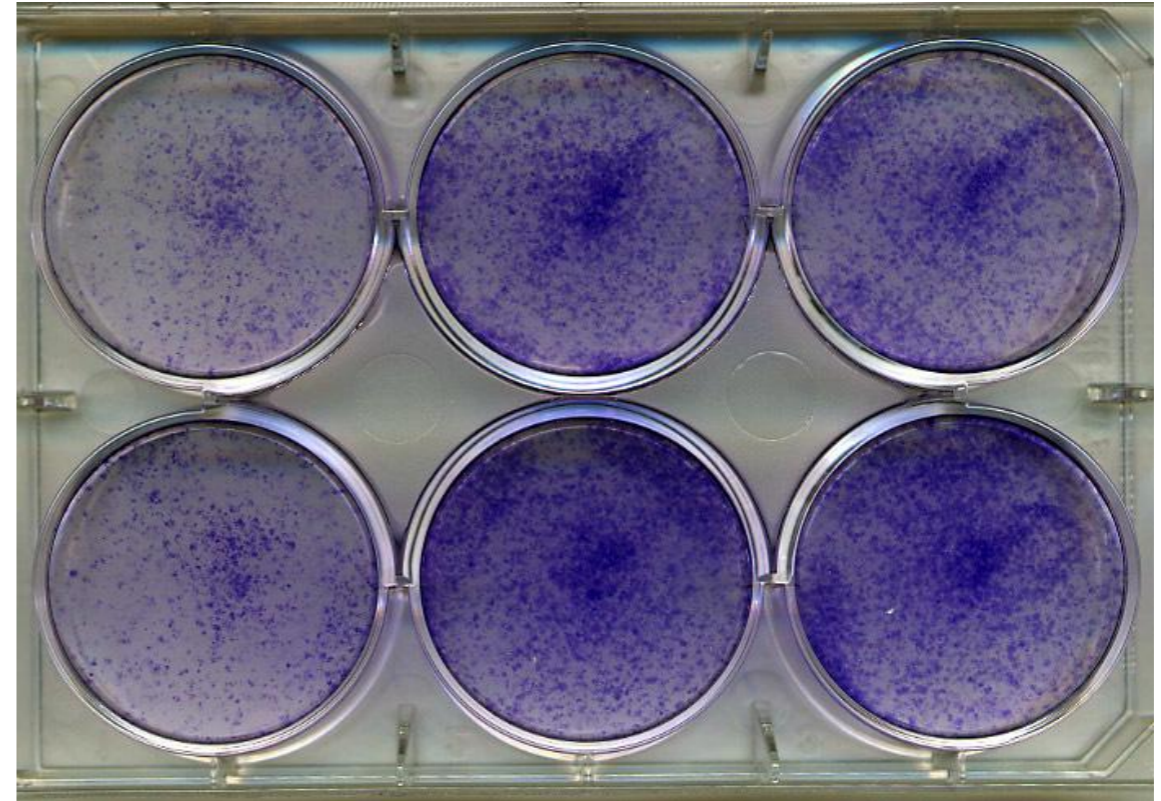

permissive

Non permissive

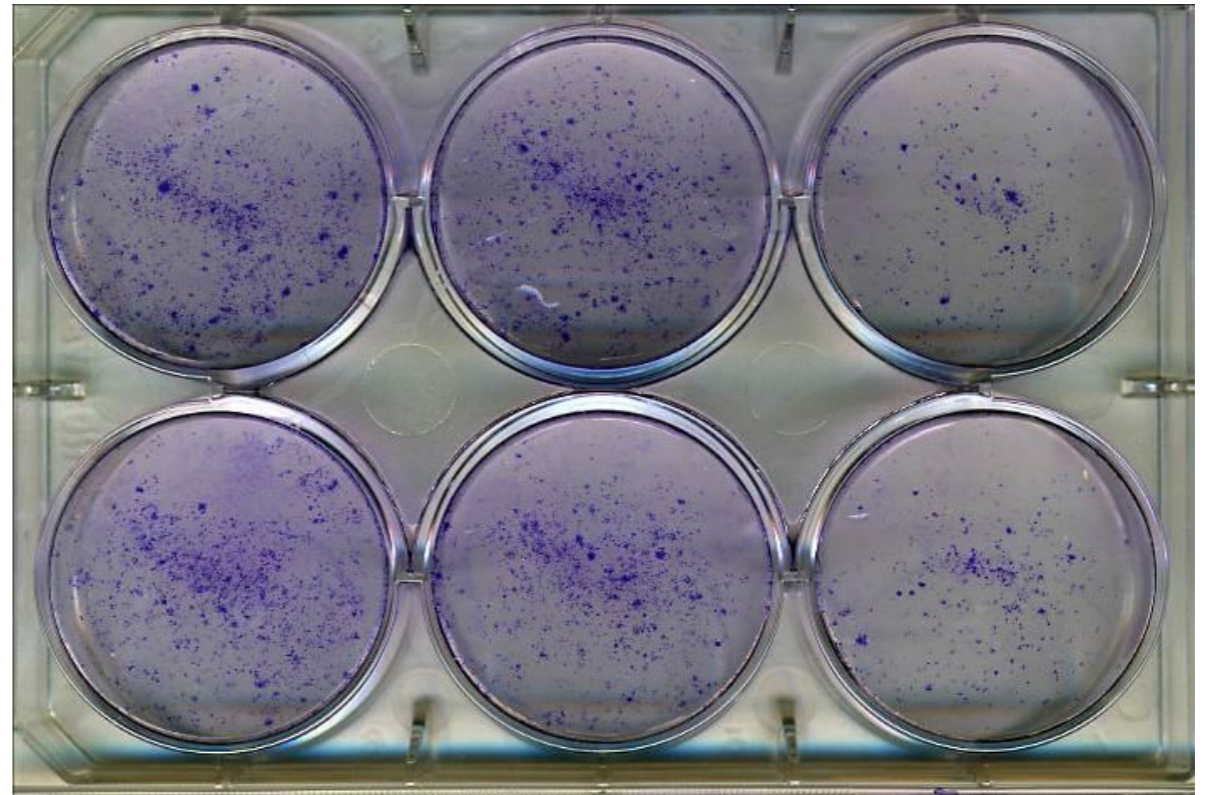

# HCF-1<sub>N1011Δ451-750</sub>

1<sup>st</sup> transfection

2<sup>nd</sup> transfection

3<sup>rd</sup> transfection

permissive

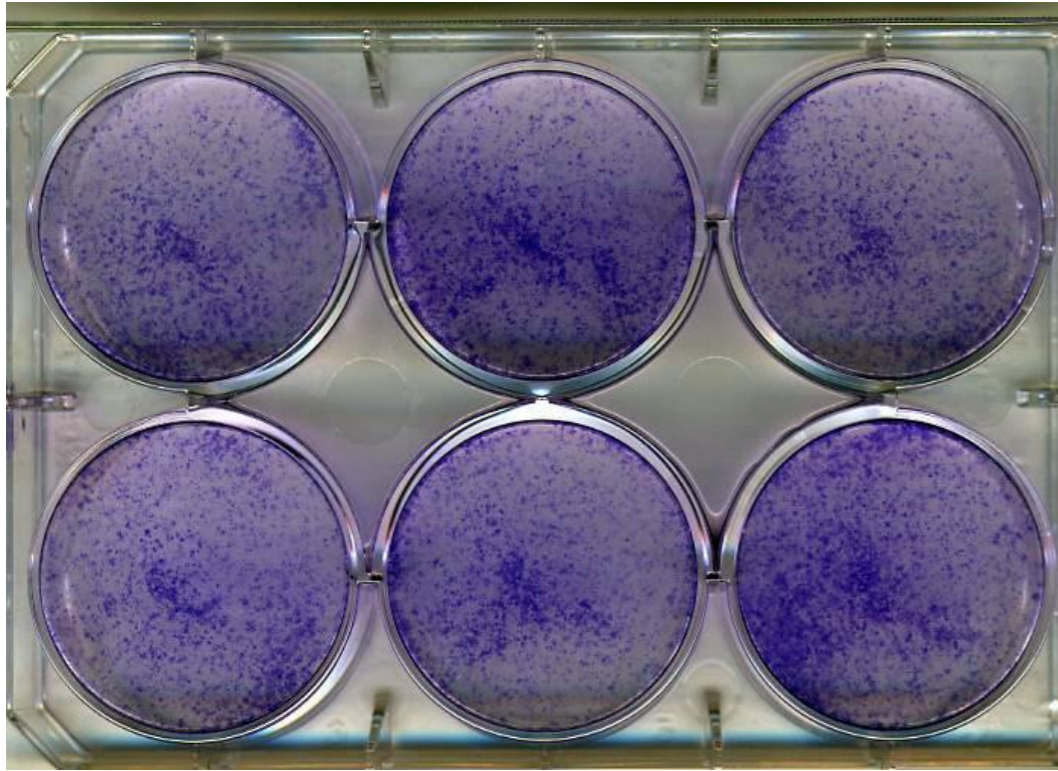

Non permissive

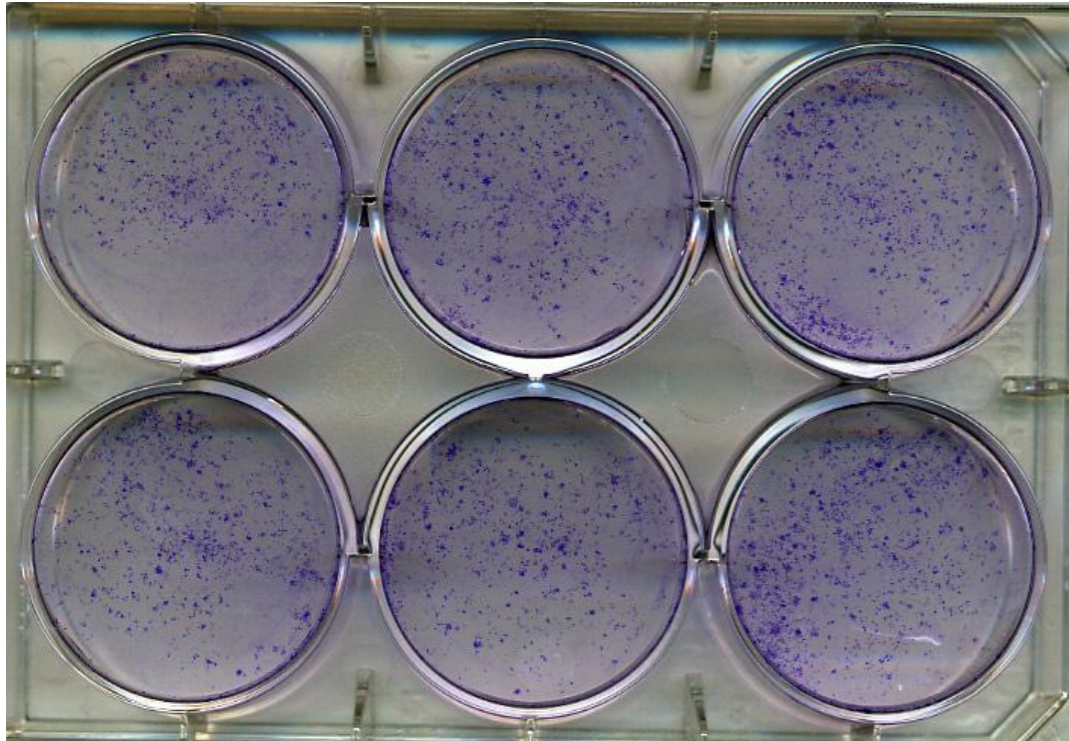

# HCF-1<sub>N1011Δ951-1000</sub>

1<sup>st</sup> transfection

2<sup>nd</sup> transfection

3<sup>rd</sup> transfection

permissive

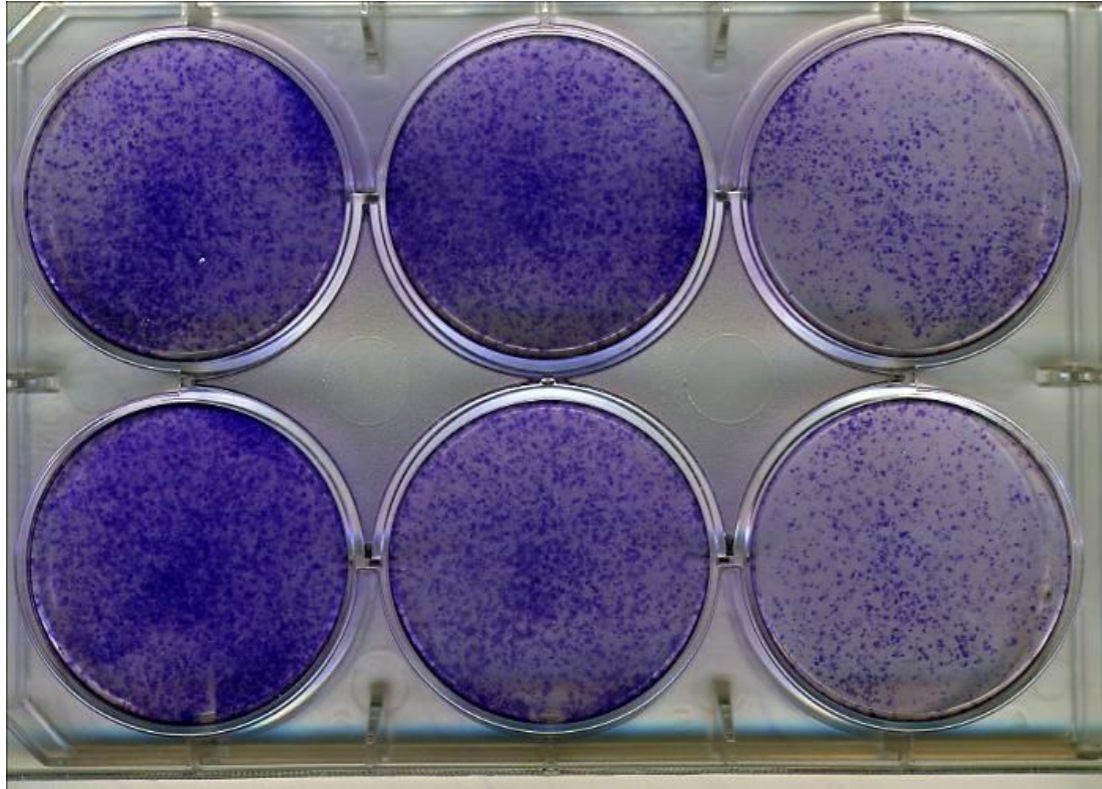

Non permissive

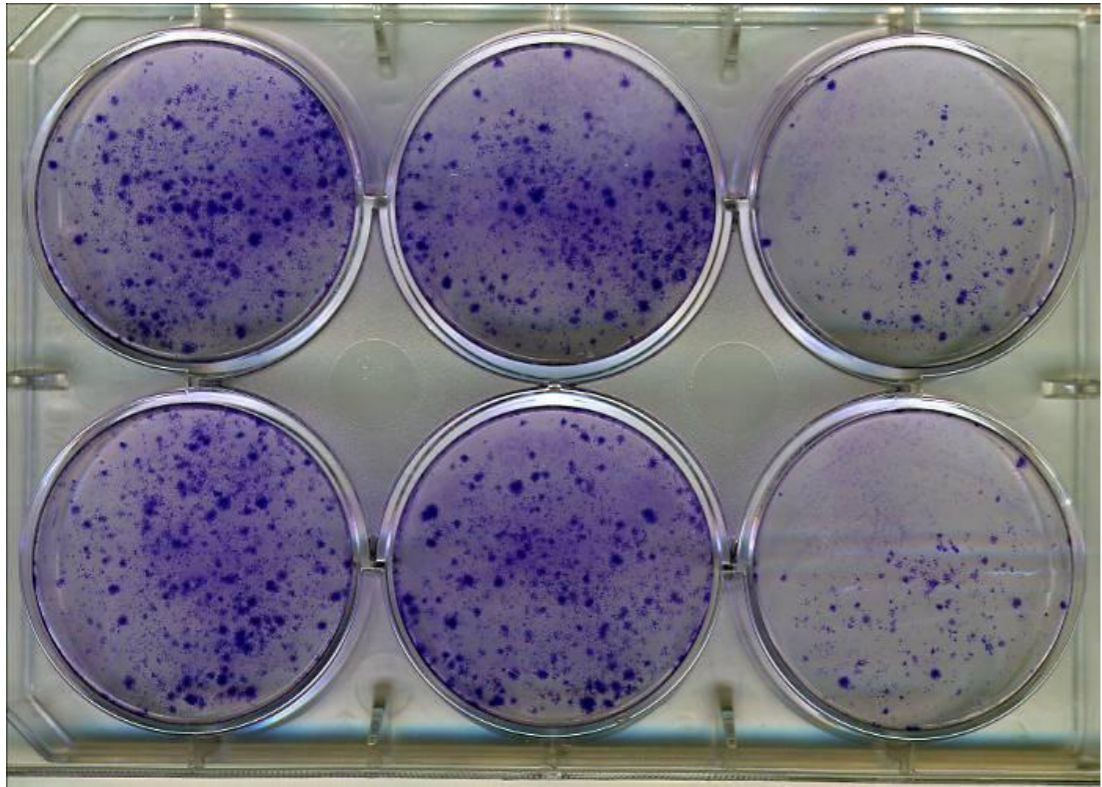

# HCF-1<sub>N1011Δ901-1000</sub>

1<sup>st</sup> transfection

2<sup>nd</sup> transfection

3<sup>rd</sup> transfection

permissive

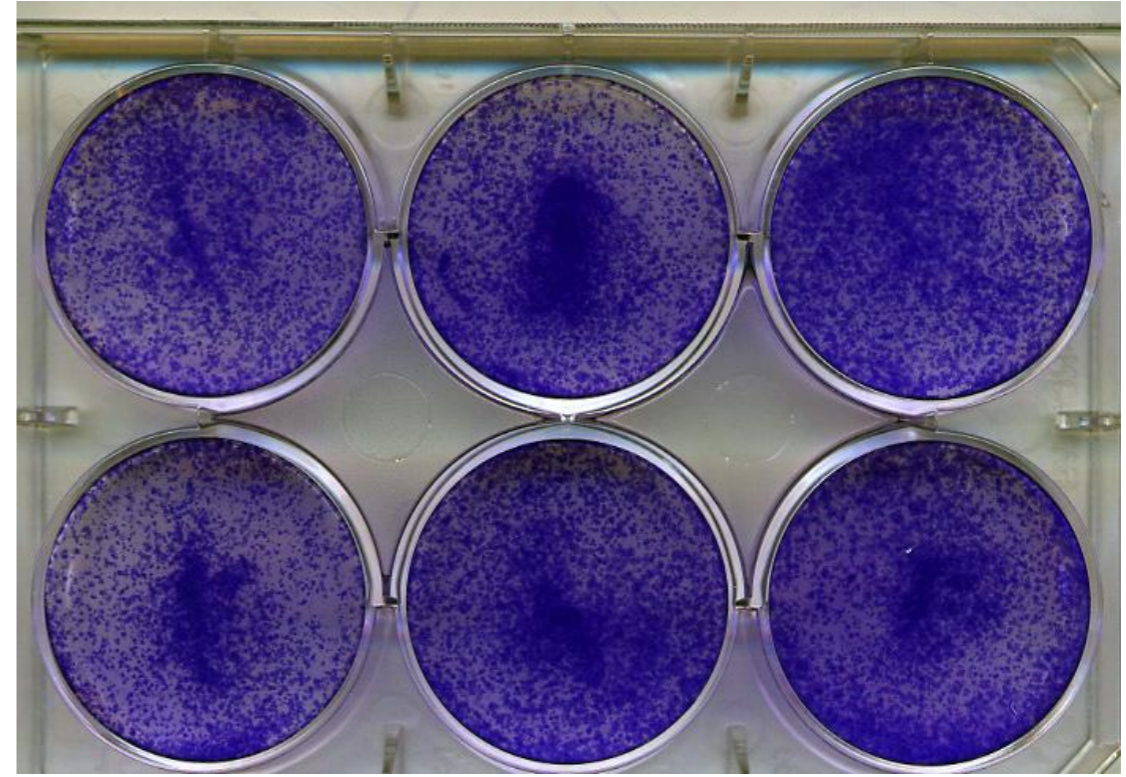

Non permissive

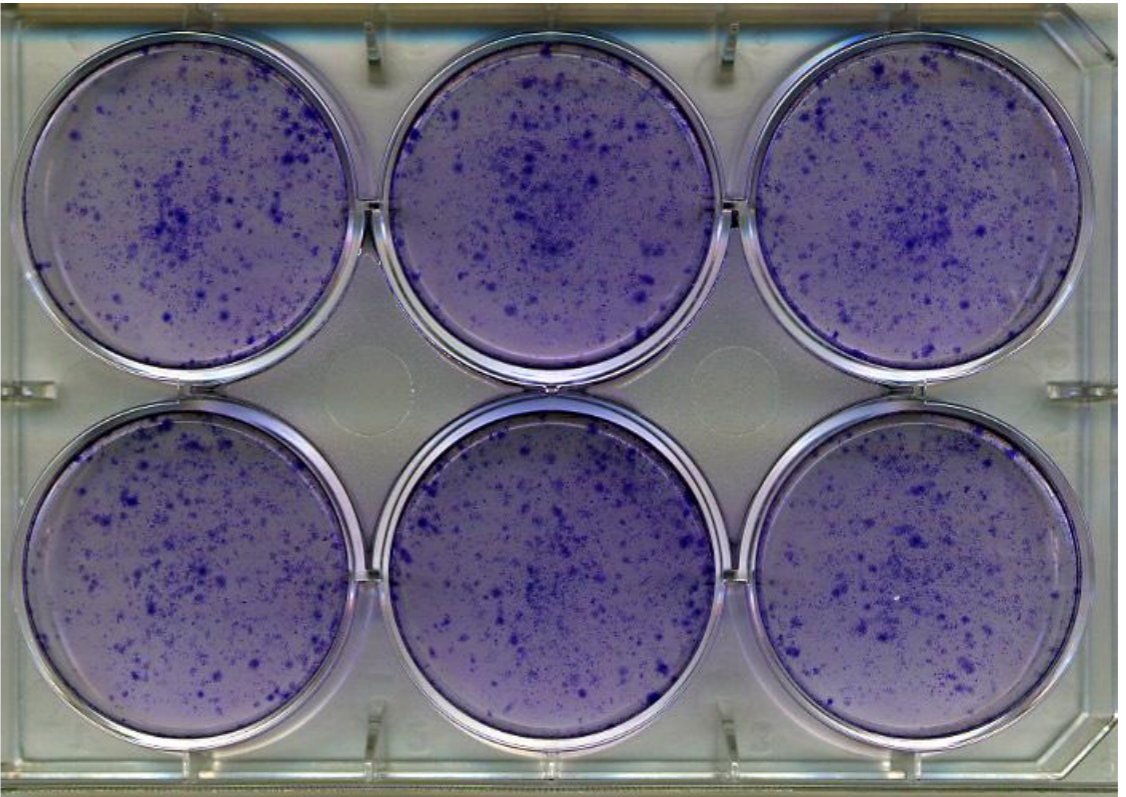

# HCF-1<sub>N1011Δ851-1000</sub>

1<sup>st</sup> transfection

2<sup>nd</sup> transfection

3<sup>rd</sup> transfection

permissive

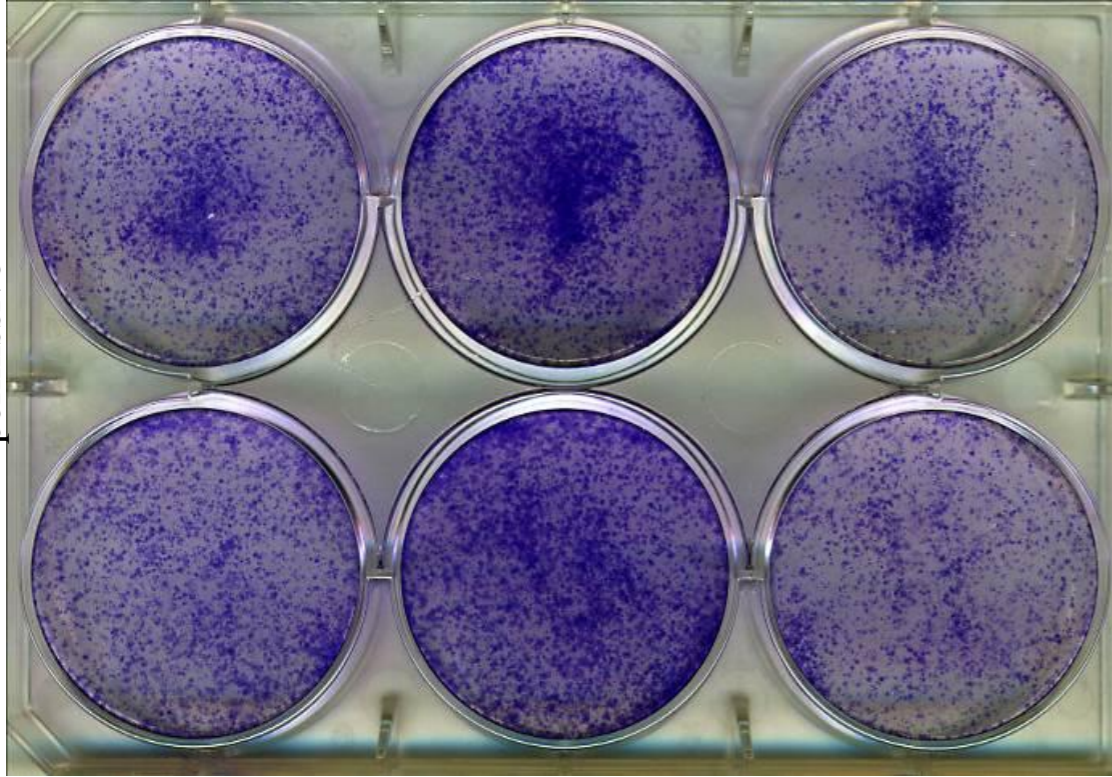

Non permissive

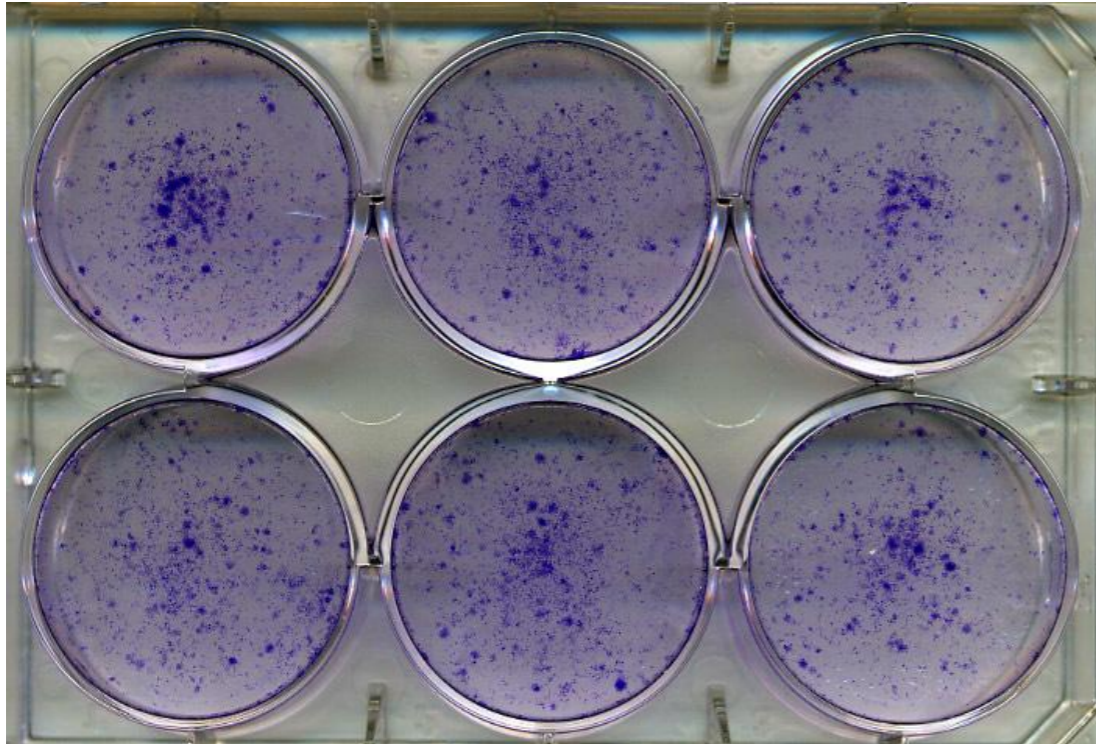

# HCF-1<sub>N1011Δ801-1000</sub>

1<sup>st</sup> transfection

2<sup>nd</sup> transfection

3<sup>rd</sup> transfection

permissive

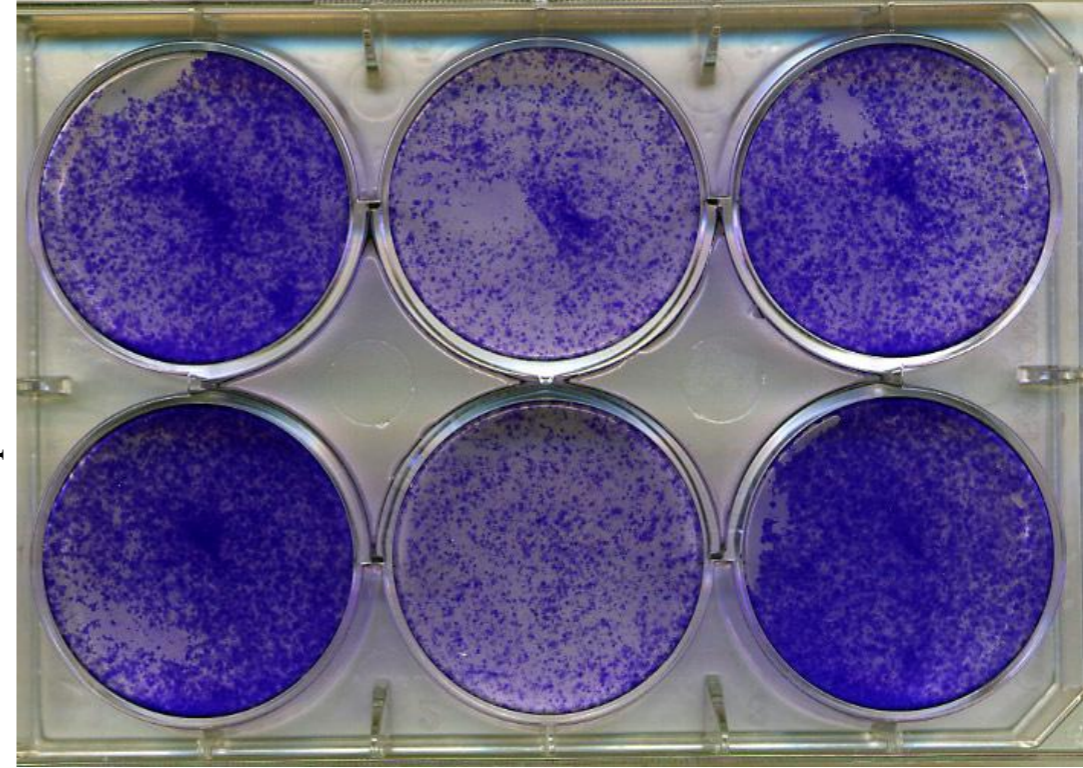

permissive

Non permissive

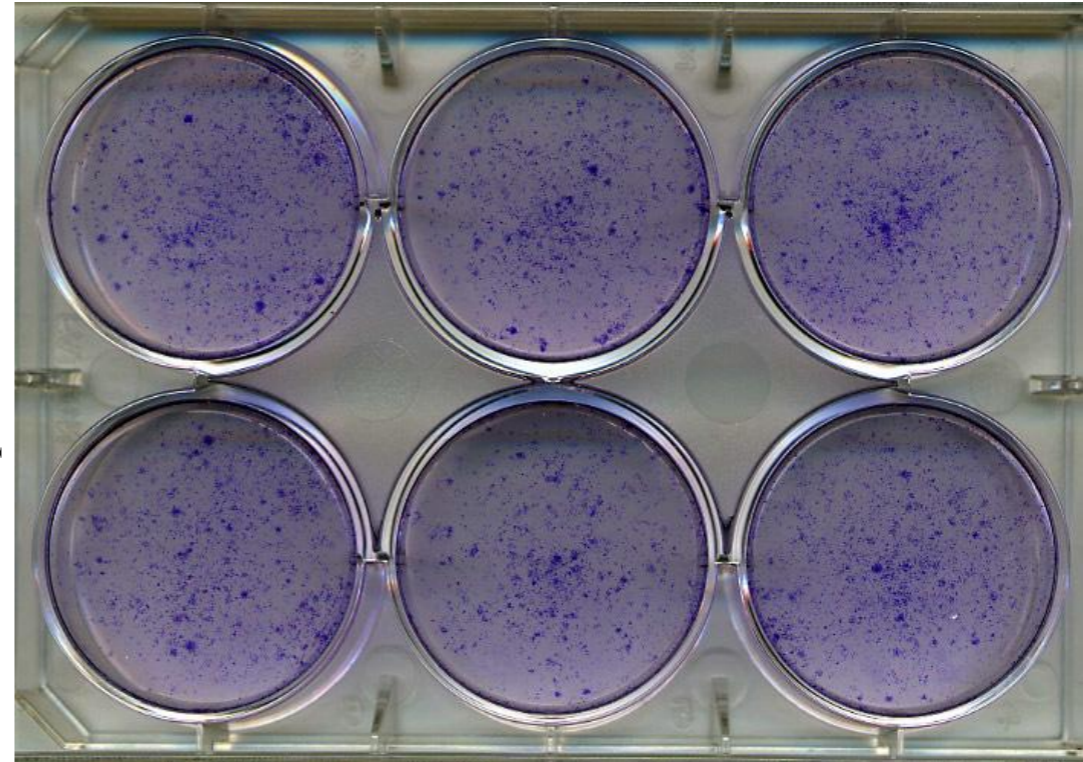

Non permissive

# HCF-1<sub>N1011Δ751-1000</sub>

1<sup>st</sup> transfection

2<sup>nd</sup> transfection

3<sup>rd</sup> transfection

permissive

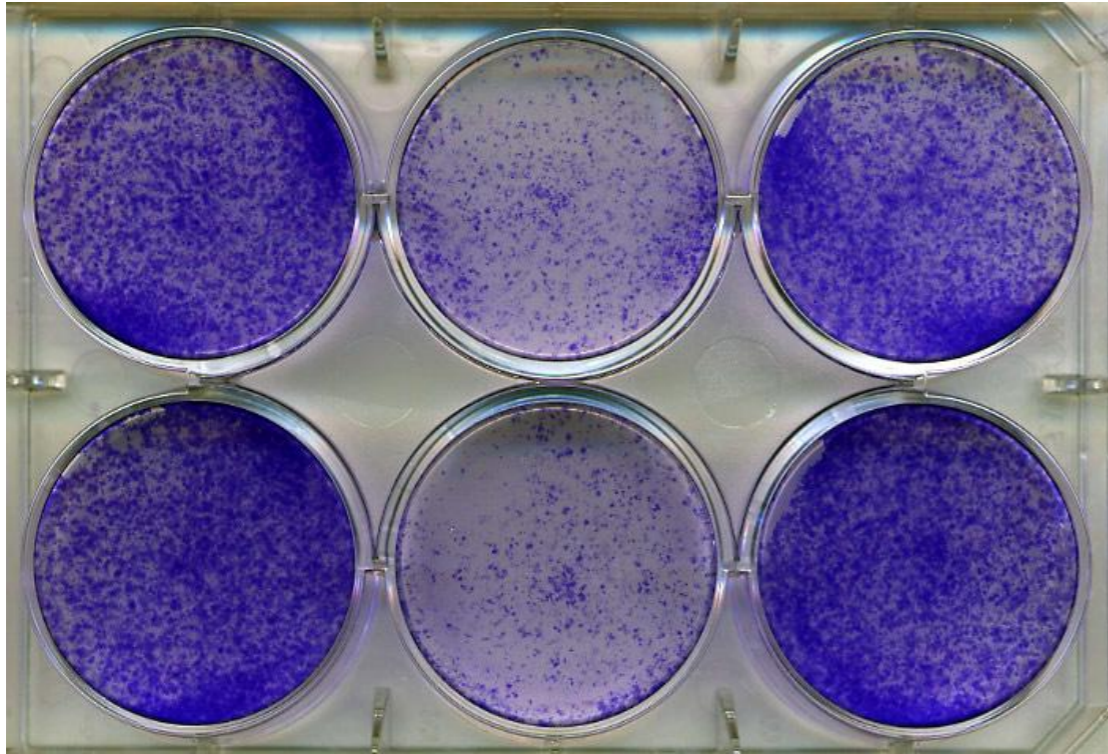

Non permissive

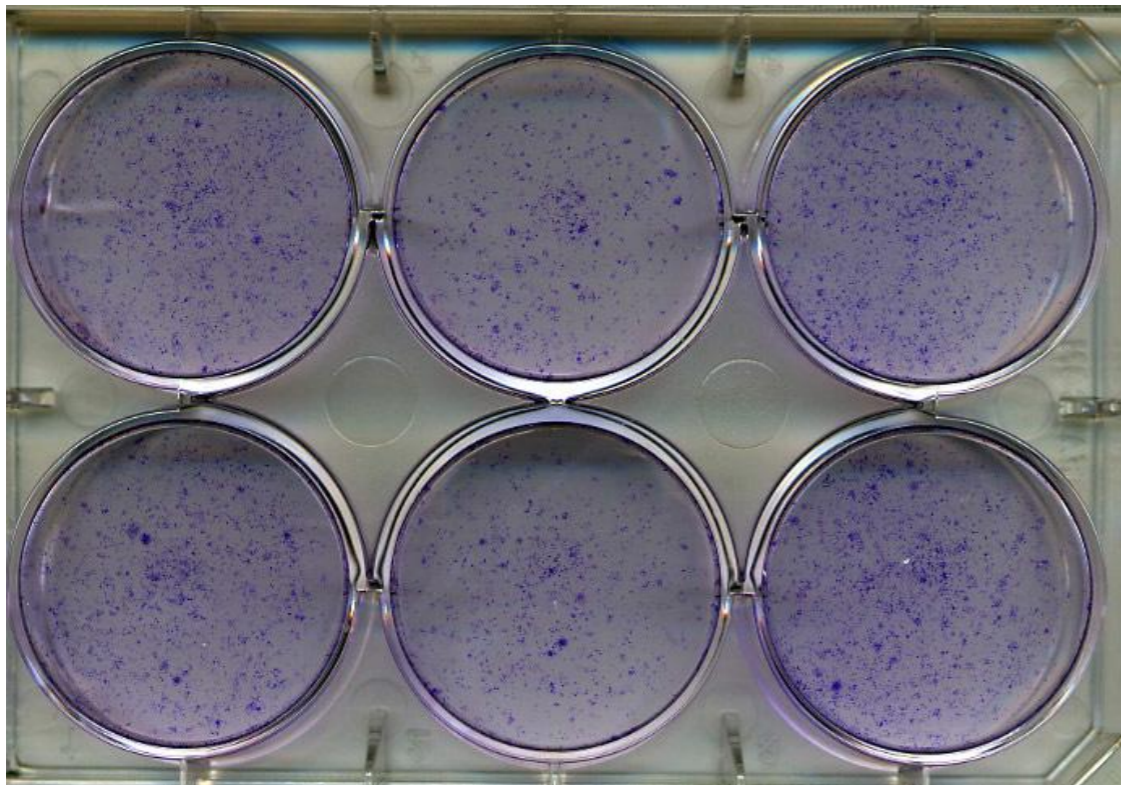

# HCF-1<sub>N1011</sub>

1<sup>st</sup> transfection

2<sup>nd</sup> transfection

3<sup>rd</sup> transfection

permissive

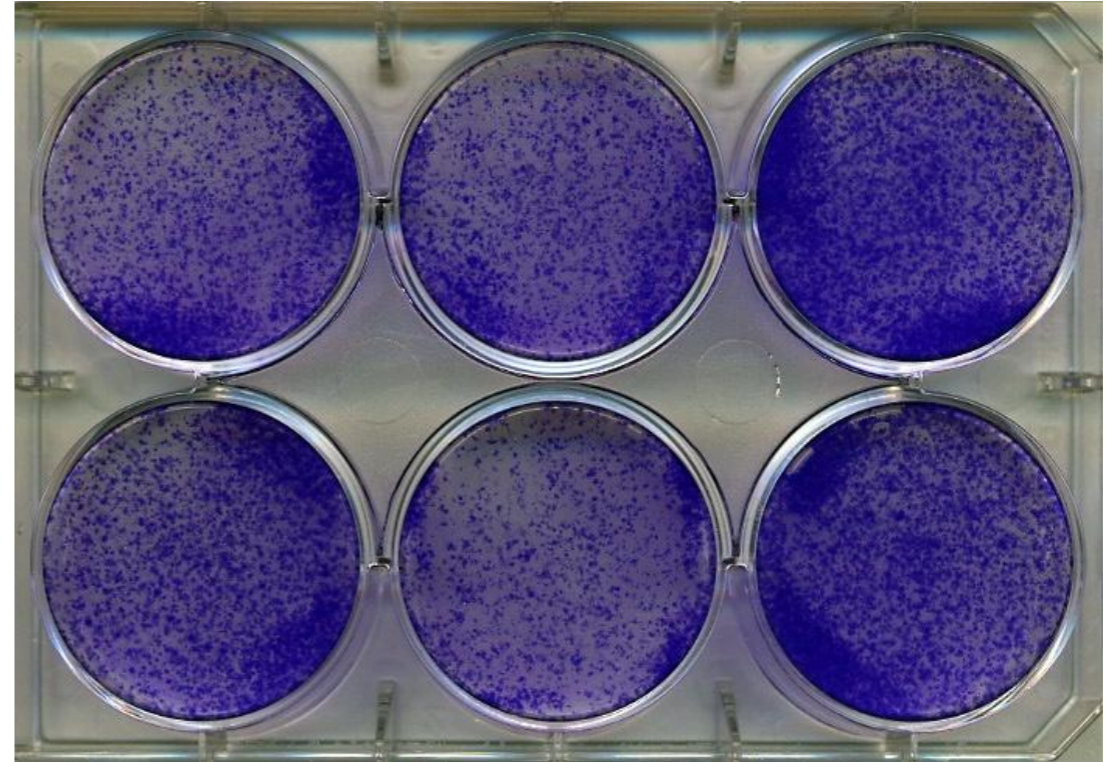

Non permissive

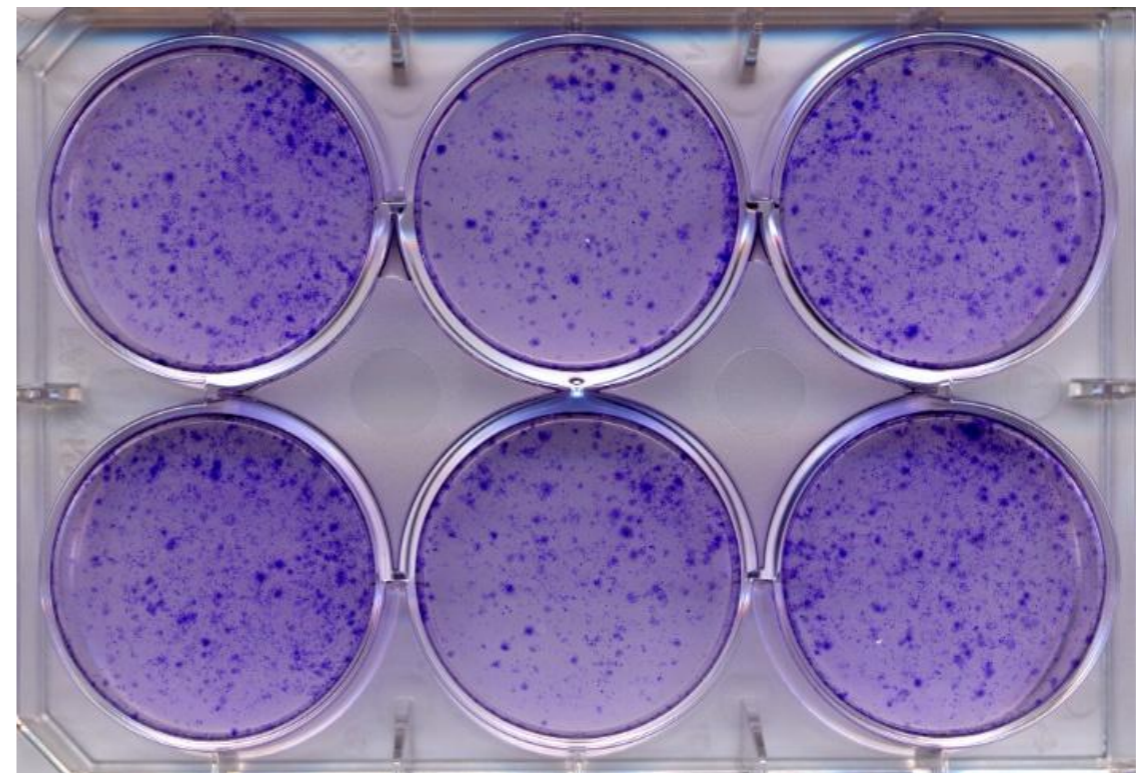

# HCF-1<sub>N1011Δ451-1000</sub>

1<sup>st</sup> transfection

2<sup>nd</sup> transfection

3<sup>rd</sup> transfection

permissive

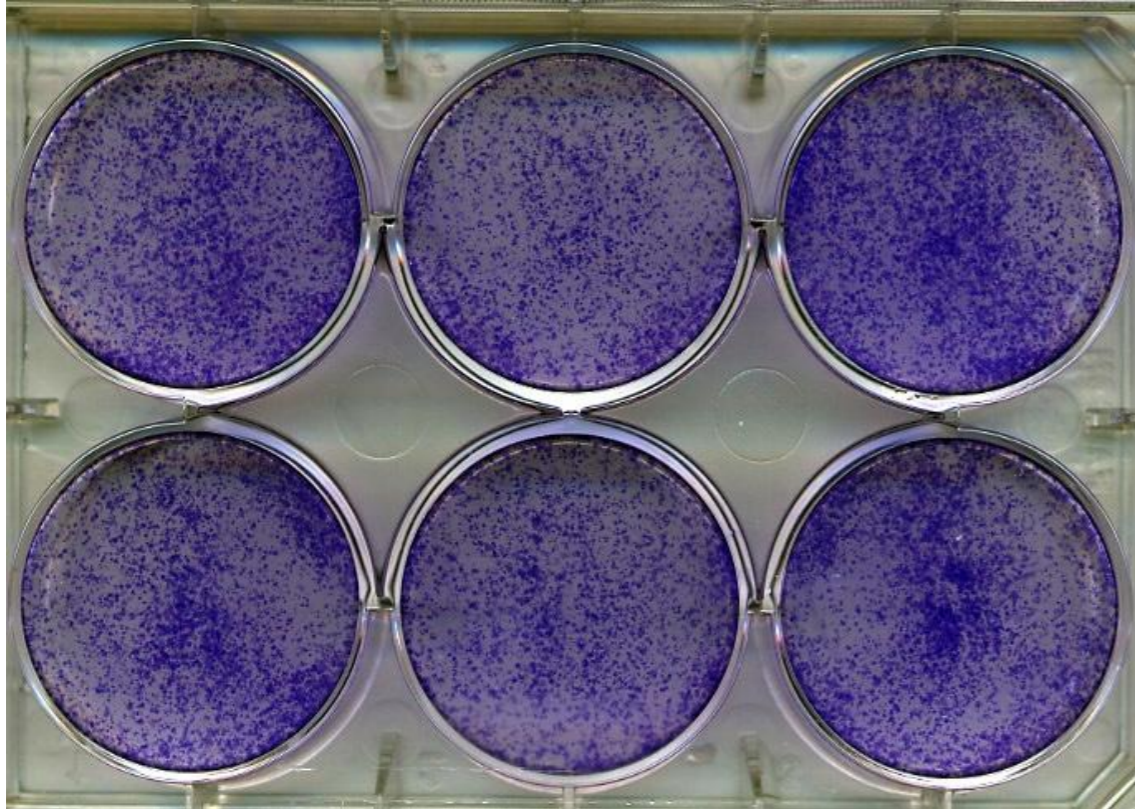

Non permissive

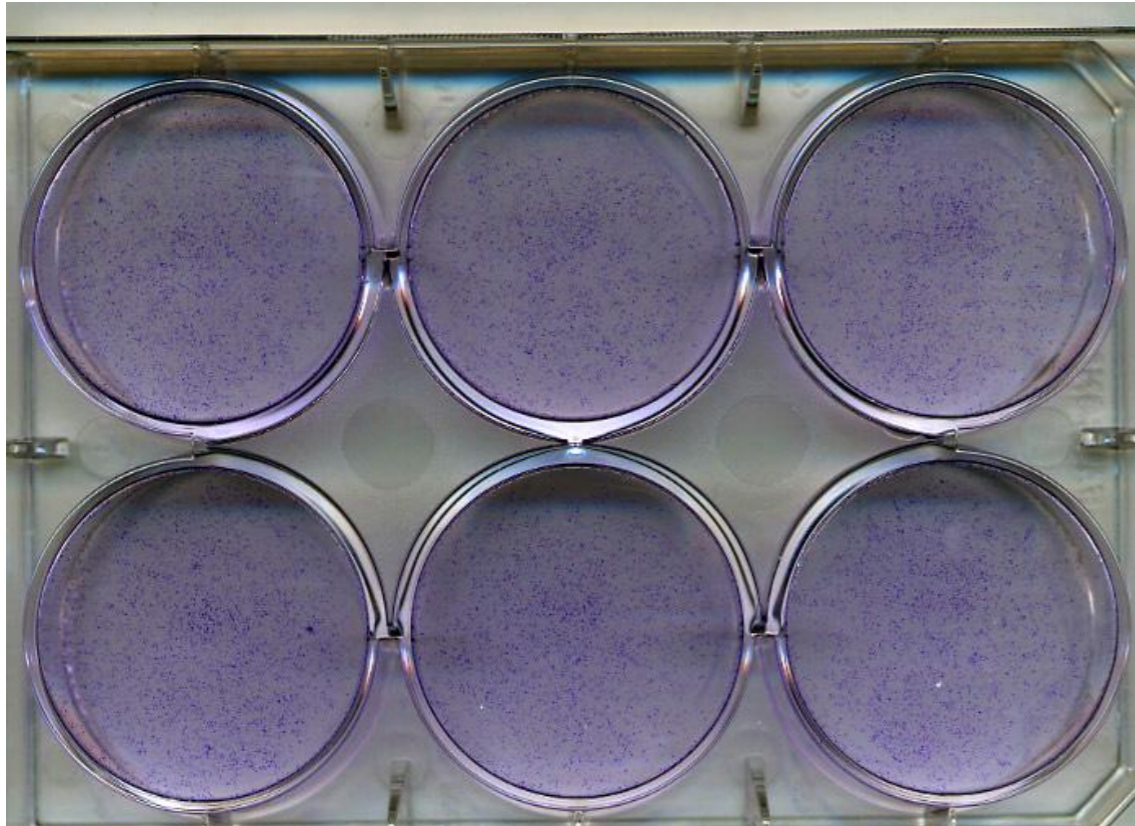

# HCF-1<sub>N1011</sub>

Empty vector

No DNA

permissive

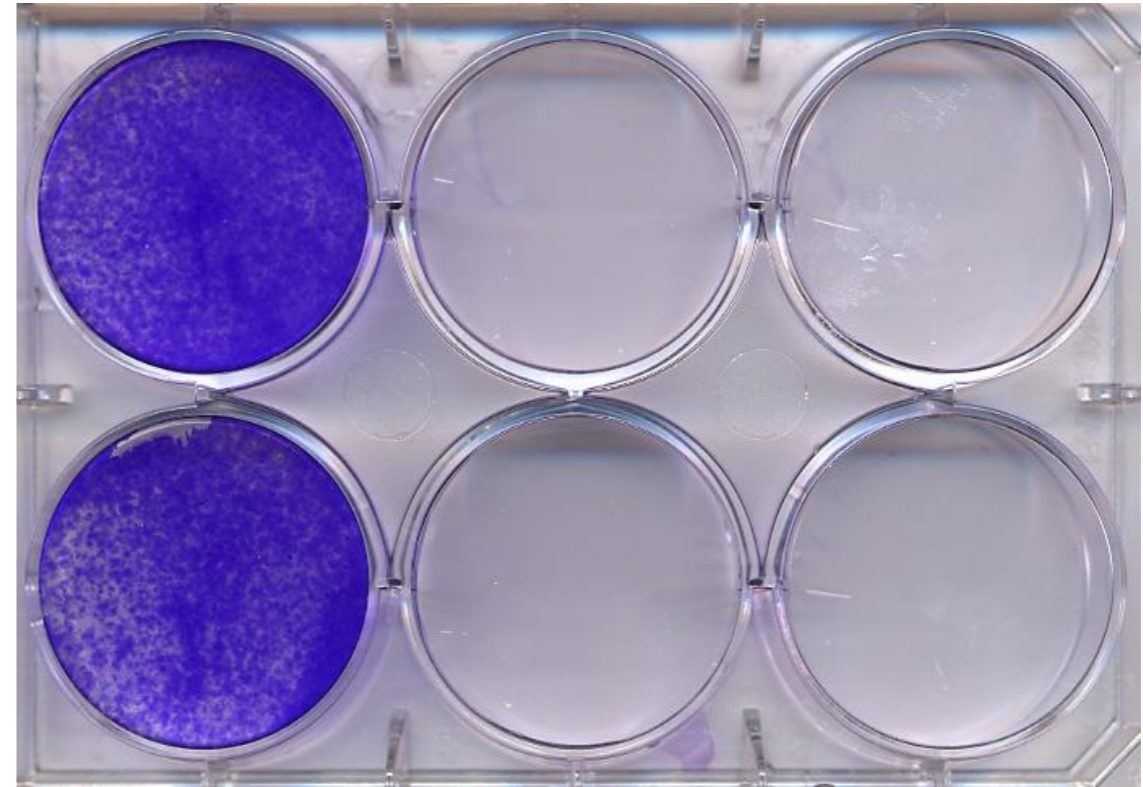

Non permissive

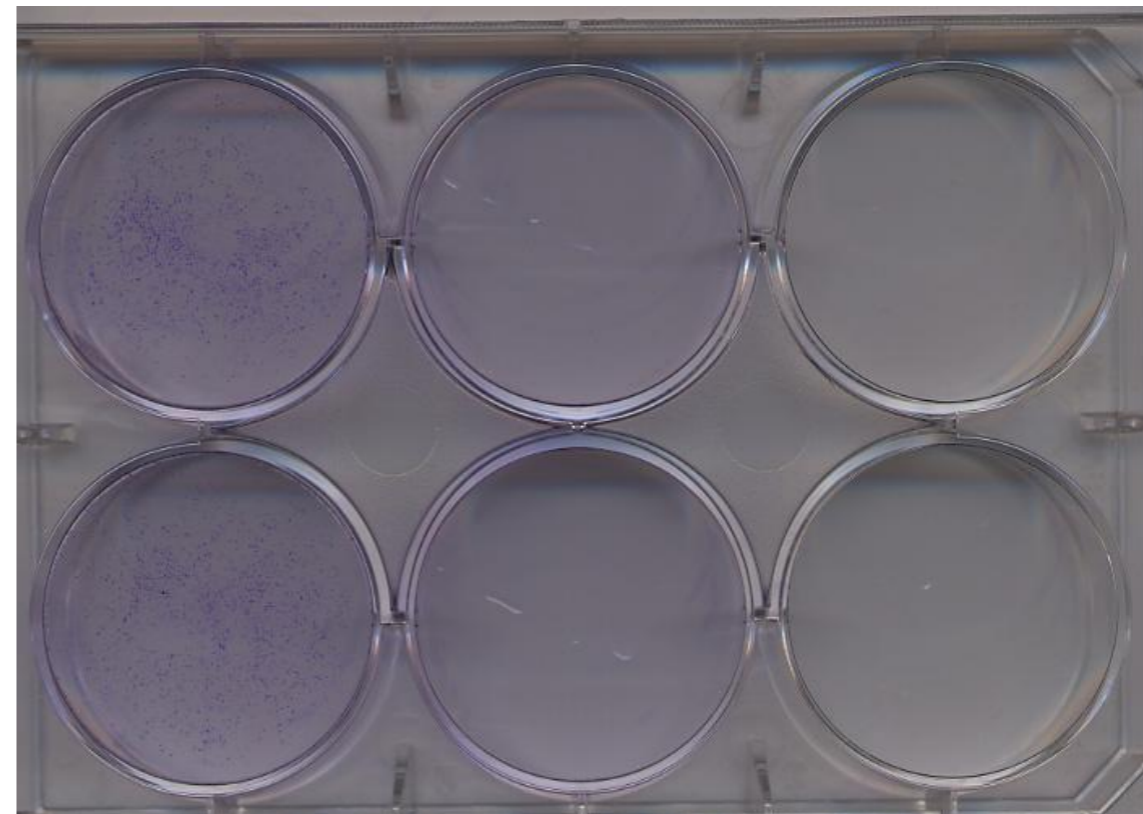



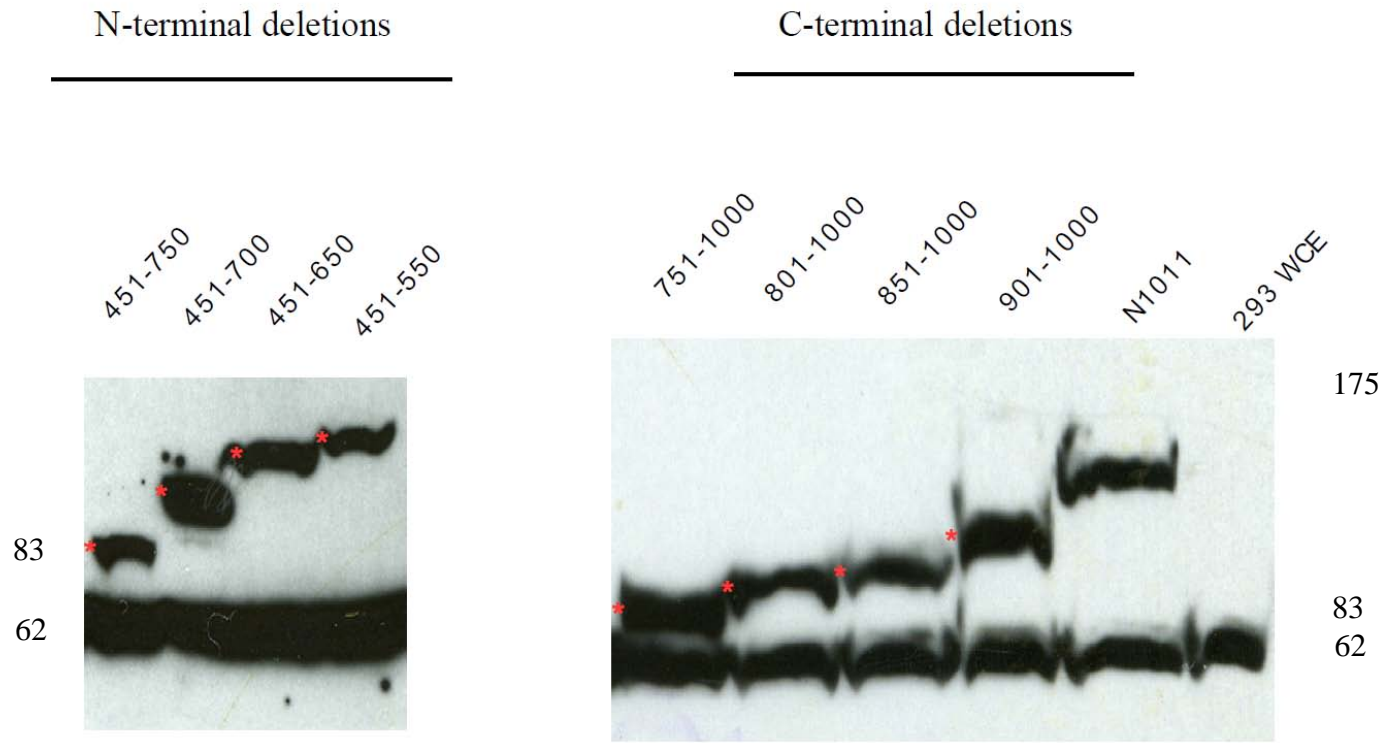

**Supplemental Figure 2: Protein expression of the mutants containing increased N- and C-terminal deletions**

Each of the N- and C-terminal deletion mutant was tested for protein expression in 293 cells using alpha-HA (12CA5) antibody. All the full length and mutant constructs directed synthesis of an appropriately sized protein. Red asterisks highlight cross-reactive bands for the predicted protein.
