# Supplementary material for: Role of the HCF-1 Basic Region in Sustaining Cell Proliferation
Source: PubMed Central journal article supplement (PMC2814863; doi:10.1371/journal.pone.0009020), 2010-02-02
Supplement: pone.0009020.s005.pdf [file pone.0009020.s005.pdf]

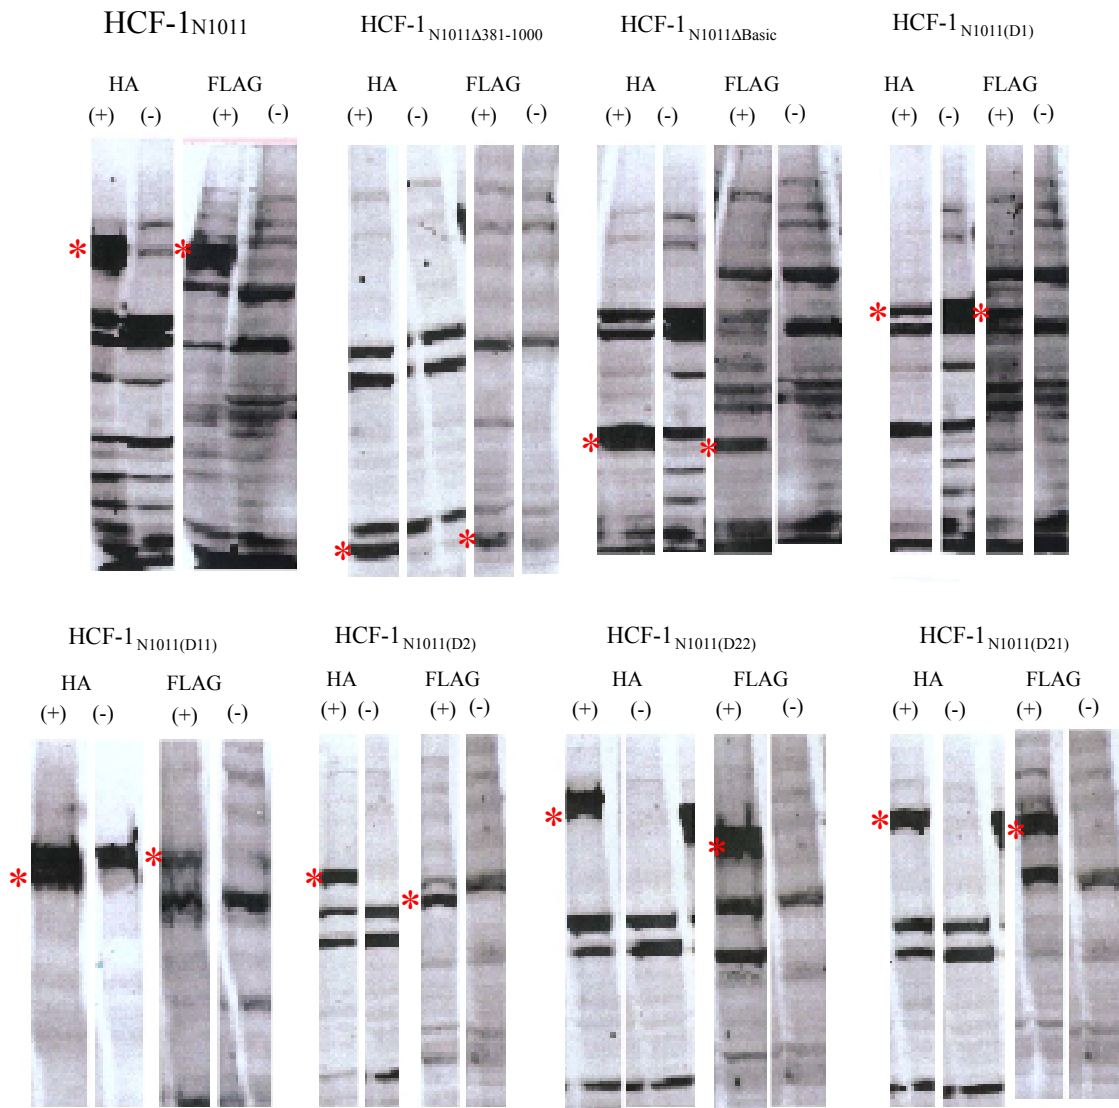

**Supplemental Figure 4: Stable Expression of selected HCF-1 N-terminal deletion mutants in HeLa cells.** Each mutant has been tested with HA and FLAG antibodies (red asterisks) and is shown with 293 wt cells (-)
