# Supplementary material for: Role of the HCF-1 Basic Region in Sustaining Cell Proliferation
Source: PLoS One. 2010 Feb 2;5(2):e9020. doi: 10.1371/journal.pone.0009020 (PMC2814863; doi:10.1371/journal.pone.0009020)
Supplement: Table S1 — List of the primers used in this manuscript. (0.09 MB DOC) [file pone.0009020.s001.doc]

**Table S1: Primer list.**

1. 50 amino acid scanning deletion mutants:

| 1. 5’HCF-1N1011Δ541-500 | TAGTGCGAGGACGGGAACCAGTGGTACGCT |
| --- | --- |
| 1. 3’HCF-1N1011Δ541-500 | AGCGTACCACTGGTTCCCGTCCTCGCACTA |
| 1. 5’HCF-1 N1011Δ501-550 | TGTTGTCCTTGAGGTCGGCGACGCCGGCGA |
| 1. 3’HCF-1 N1011Δ501-550 | TCGCCGGCGTCGCCGACCTCAAGGACAACA |
| 1. 5’HCF-1 N1011Δ551-600 | CCCTACCGGCGTGACCAGTACCACTCGTTG |
| 1. 3’HCF-1 N1011Δ551-600 | CAACGAGTGGTACTGGTCACGCCGGTAGGG |
| 1. 5’HCF-1 N1011Δ601-650 | CACGGAGGAGCGGTCACTGGTGTCAACAC |
| 1. 3’HCF-1 N1011Δ601-650 | GTGTTGACACCAGTGACCGCTCCTCCGTG |
| 1. 5’HCF-1 N1011Δ651-700 | GTCGTTCGGGTCCACGTCCGCAGGTGCCCA |
| 1. 3’HCF-1 N1011Δ651-700 | TGGGCACCTGCGGACGTGGACCCGAACGAC |
| 1. 5’HCF-1 N1011Δ701-1000 | AGTCGTCAGTGTCCGTAGGACCCGTAGTCG |
| 1. 3’HCF-1 N1011Δ701-1000 | CGACTACGGGTCCTACGGACACTGACGACT |
| 1. 5’HCF-1 N1011Δ751-800 | CCCTGGTTCGGGTGGTGGTGGTTCCACTAC |
| 1. 3’HCF-1 N1011Δ751-800 | GTAGTGGAACCACCACCACCCGAACCAGGG |
| 1. 5’HCF-1 N1011Δ801-850 | GGGTAGTGGTAGTAGGGGTACCCCCCACAA |
| 1. 3’HCF-1 N1011Δ801-850 | TTGTGGGGGGTACCCCTACTACCACTACCC |
| 1. 5’HCF-1 N1011Δ851-900 | TAGGAGGCGTGACACGTGTCGTGATCACGA |
| 1. 3’HCF-1 N1011Δ851-900 | TCGTGATCACGACACGTGTCACGCCTCCTA |
| 1. 5’HCF-1 N1011Δ901-950 | CGGCCCCGCCCCCCGTGGTACGTCGGGCAC |
| 1. 3’HCF-1 N1011Δ901-950 | GTGCCCGACGTACCACGGGGGGCGGGGCCG |
| 1. 5’HCF-1 N1011Δ951-1000 | TGTTGGGGTTGGTAGCCGGTCCCACTACAC |
| 1. 3’HCF-1 N1011Δ951-1000 | GTGTAGTGGGACCGGCTACCAACCCCAACA |

1. **N-terminal and C-termina**l deletion mutants:

| 5’HCF-1N1011 Δ451-750 | CACGCTCCTGCCCCACCTGGGCATCAGCAG |
| --- | --- |
| 3’HCF-1N1011 Δ451-750 | CTGCTGATGCCCAGGTGGGGCAGGAGCGTG |
| 5’HCF-1 N1011 Δ451-700 | CACGCTCCTGCCCCCTGGGGCAGGAGCGTG |
| 3’HCF-1 N1011 Δ451-700 | CACGCTCCTGCCCCAGGGGGCAGGAGCGTG |
| 5’HCF-1 N1011 Δ451-650 | CACGCTCCTGCCCCGACCACACAGTTGTGGG |
| 3’HCF-1 N1011 Δ451-650 | CCCACAACTGTGTGGTCGGGGCAGGAGCGTG |
| 5’HCF-1 N1011 Δ451-550 | CACGCTCCTGCCCCACGCTGCGGCCGCTGC |
| 3’HCF-1 N1011 Δ451-550 | GCAGCGGCCGCAGCGTGGGGCAGGAGCGTG |
| 5’HCF-1 N1011 Δ751-1000 | GACCAAGCCCACCATCCAGGGTGATGTGCA |
| 3’HCF-1 N1011 Δ751-1000 | TGCACATCACCCTGGATGGTGGGCTTGGTC |
| 5’HCF-1 N1011 Δ801-1000 | CATCACCATCACACCCAGGGTGATGTGCA |
| 3’HCF-1 N1011 Δ801-1000 | TGCACATCACCCTGGGTGTGATGGTGATG |
| 5’HCF-1 N1011 Δ851-1000 | CATCCTCCGCACTGTCCAGGGTGAATGTGCA |
| 3’HCF-1 N1011 Δ851-1000 | TGCACATTCACCCTGGACAGTGCGGAGGATG |
| 5’HCF-1 N1011 Δ901-1000 | CGGGGCGGGGGGCCACCAGGGTGATGTGCA |
| 3’HCF-1 N1011 Δ901-1000 | TGCACATCACCCTGGTGGCCCCCCGCCCCG |

1. **HCF-1 duplication mutants and other constructs**:

| 5’HCF-1 N1011 D1 | GATCCAGGCTGCCCCCGCACCCCCG |
| --- | --- |
| 3’HCF-1 N1011 D1 | CGGGGGTGCGGGGGCAGCCTGGATC |
| 5’HCF-1 N1011 D2 | GATCGCGTCCACGGGTCCTGTGAC |
| 3’HCF-1 N1011 D2 | GTCACAGGACCCGTGGACGCGATC |
| 5’HCF-1 N1011 Δ Basic | CTGCACATCACCCTGTGGGGCAGGAGCGTG |
| 3’HCF-1 N1011 Δ Basic | CACGCTCCTGCCCCACAGGGTGATGTGCAG |
| 5’HCF-1 N1011 D1-D1 STOP | TGCGGGGGCAGCCTGCACCAGCTTCAGGAT |
| 3’HCF-1 N1011 D1-D1 STOP | ATCCTGAAGCTGGTGCAGGCTGCCCCCGCA |
| 5’HCF-1 N1011 D2-D2 STOP | GCCATCTGCTGAGGTGCCTGAGTCGGCGAT |
| 3’HCF-1 N1011 D2-D2 STOP | ATCGCCGACTCAGGCACCTCAGCAGATGGC |
